# Supplementary material for: Novel biocompatible core/shell Fe3O4@NFC@Co(ii) as a new catalyst in a multicomponent reaction: an efficient and sustainable methodology and novel reusable material for one-pot synthesis of 4H-pyran and pyranopyrazole in aqueous media
Source: Royal Society of Chemistry journal article supplement (doi:10.1039/d0ra04698a), 2020-01-01

## Supporting Information

### **Novel biocompatible Core/Shell Fe<sub>3</sub>O<sub>4</sub>@NFC@Co (II) as a new catalyst in multicomponent reaction: an efficient and sustainable methodology and novel reusable for one-pot synthesis of 4H-pyran and pyranopyrazole in aqueous medium**

Pouya Ghamari kargar, <sup>a</sup> Ghodsieh Bagherzade\*<sup>a</sup> and Hossein Eshghi <sup>b</sup>

---

*a.* Department of Chemistry, Faculty of Sciences, University of Birjand, Birjand, 97175-615, Iran. E-mail: gbagherzade@gmail.com, bagherzadeh@birjand.ac.ir; ax: +98 56 32345192; Tel: +98 56 32345192 Address here.

*b.* Department of Chemistry, Faculty of Science, Ferdowsi University of Mashhad, Mashhad, Iran.

# Spectral data of compounds 4H-pyran and pyranopyrazol:

## Spectral data of ethyl 6-amino-5-cyano-2-methyl-4-phenyl-4H-pyran-3-carboxylate (Table 3, entry 1)

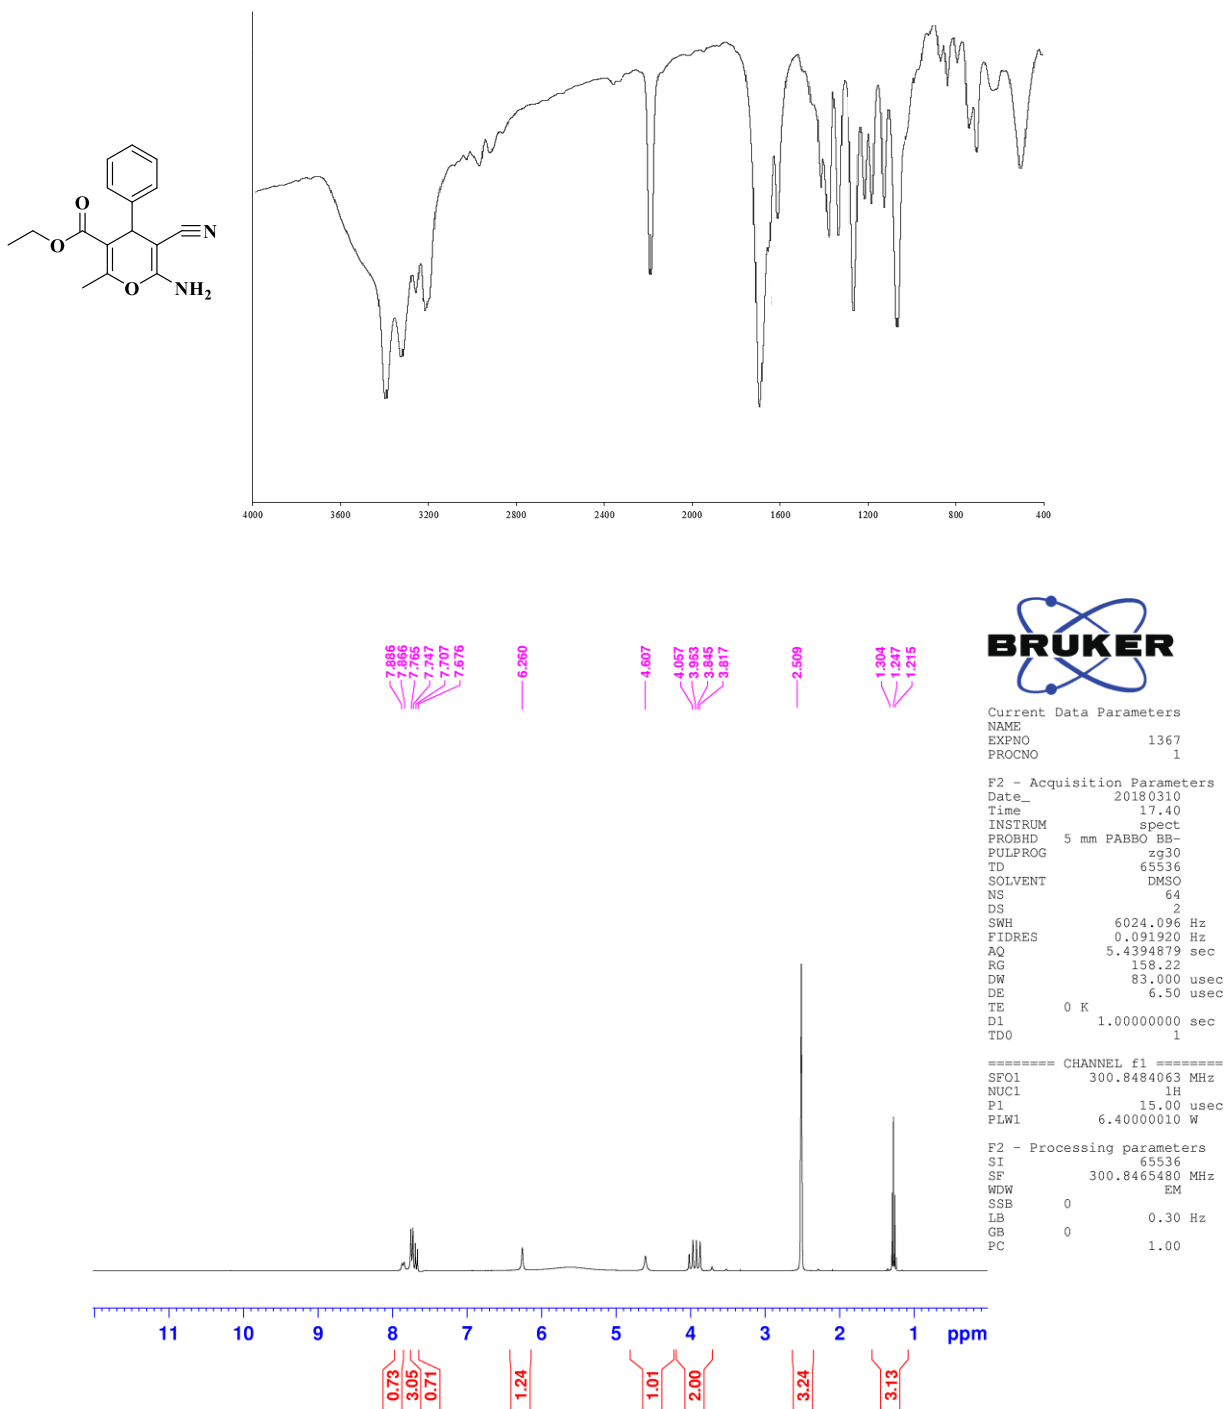

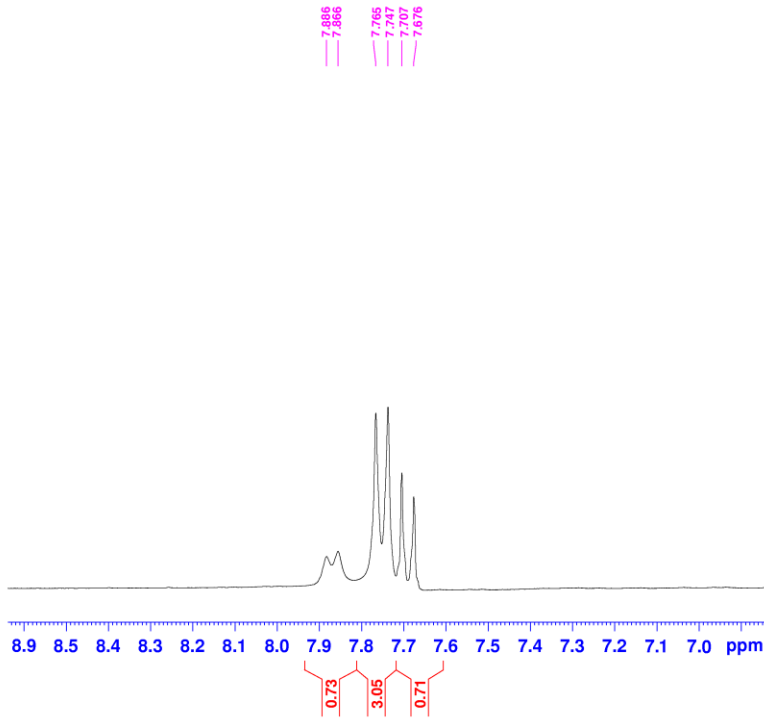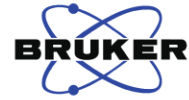

Current Data Parameters  
 NAME  
 EXPNO 1367  
 PROCNO 1

F2 - Acquisition Parameters  
 Date\_ 20180310  
 Time 17.40  
 INSTRUM spect  
 PROBHD 5 mm PABBO BB-  
 PULPROG zg30  
 TD 65536  
 SOLVENT DMSO  
 NS 64  
 DS 2  
 SWH 6024.096 Hz  
 FIDRES 0.091920 Hz  
 AQ 5.4394879 sec  
 RG 158.22  
 DW 83.000 usec  
 DE 6.50 usec  
 TE 0 K  
 D1 1.0000000 sec  
 TD0 1

===== CHANNEL f1 =====  
 SF01 300.8484063 MHz  
 NUC1 1H  
 P1 15.00 usec  
 PLW1 6.40000010 W

F2 - Processing parameters  
 SI 65536  
 SF 300.8465480 MHz  
 WDW EM  
 SSB 0  
 LB 0.30 Hz  
 GB 0  
 PC 1.00

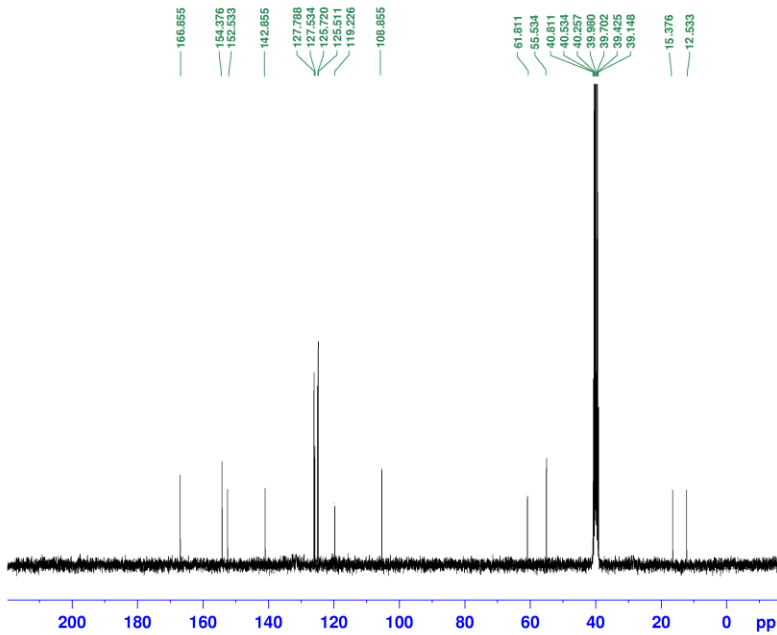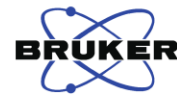

Current Data Parameters  
 NAME  
 EXPNO 1826  
 PROCNO 1

F2 - Acquisition Parameters  
 Date\_ 20180310  
 Time 18.40  
 INSTRUM spect  
 PROBHD 5 mm PABBO BB-  
 PULPROG zgpg30  
 TD 65536  
 SOLVENT DMSO  
 NS 512  
 DS 4  
 SWH 18115.941 Hz  
 FIDRES 0.276427 Hz  
 AQ 1.8087935 sec  
 RG 202  
 DW 27.600 usec  
 DE 6.50 usec  
 TE 0 K  
 D1 2.0000000 sec  
 D11 0.03000000 sec  
 TD0 1

===== CHANNEL f1 =====  
 SF01 75.6554892 MHz  
 NUC1 13C  
 P1 10.00 usec  
 PLW1 30.00000000 W

===== CHANNEL f2 =====  
 SF02 300.8477518 MHz  
 NUC2 1H  
 CPDPRG2 waltz16  
 ECPD2 90.00 usec  
 PLW2 6.40000010 W  
 PLW12 0.17778000 W  
 PLW13 0.14399999 W

F2 - Processing parameters  
 SI 32768  
 SF 75.6479250 MHz  
 WDW EM  
 SSB 0  
 LB 1.00 Hz  
 GB 0  
 PC 1.40

Spectral data of ethyl-6-amino-4-(4-chlorophenyl)-5-cyano-2-methyl-4H-pyran-3-carboxylate  
(Table 3, entry 2):

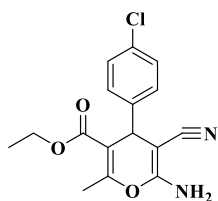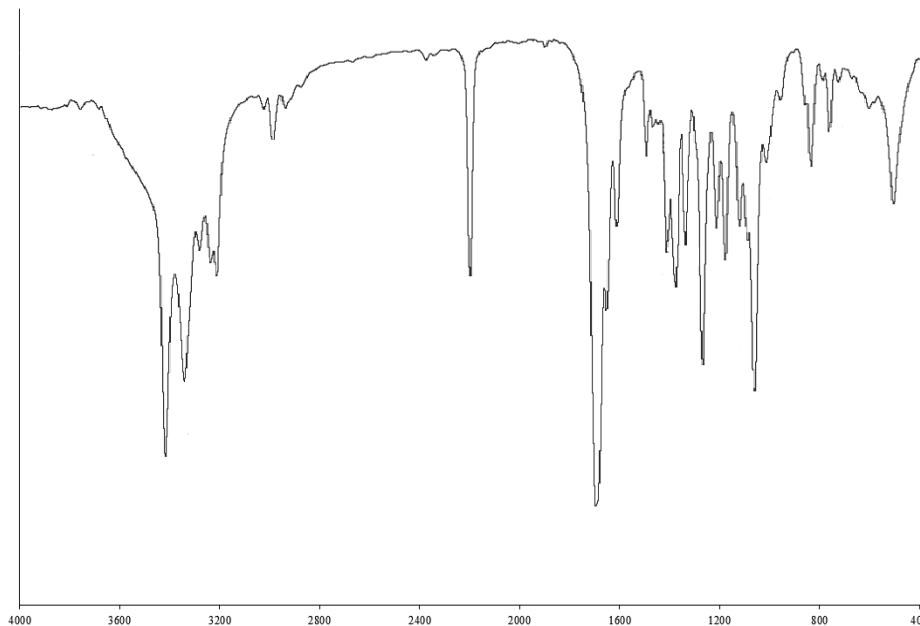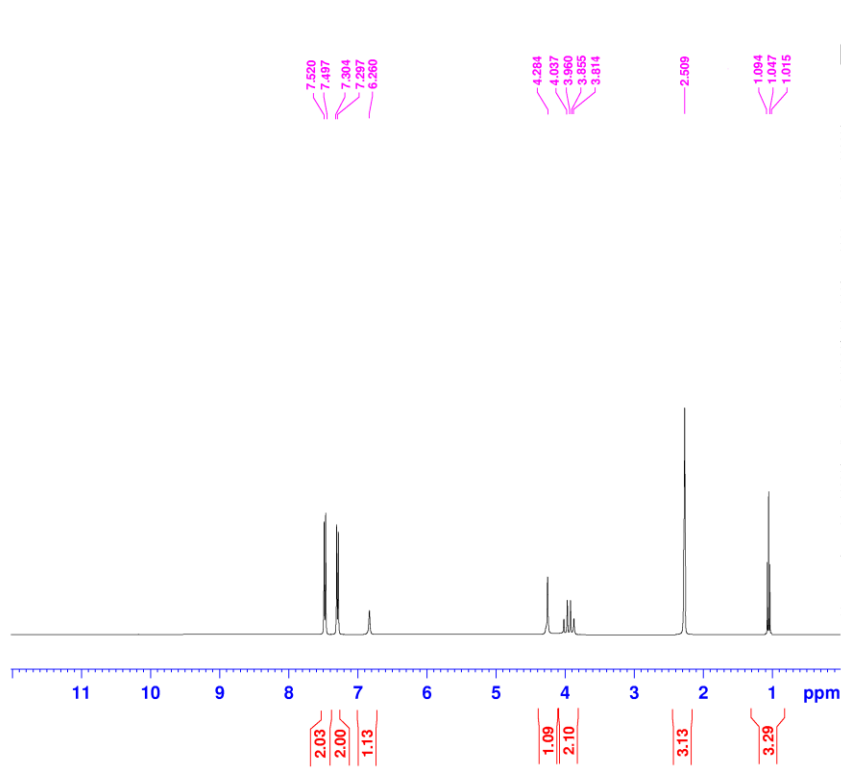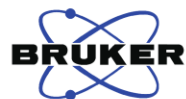

Current Data Parameters  
NAME 1367  
EXPNO 1  
PROCNO 1

F2 - Acquisition Parameters  
Date\_ 20180311  
Time 10.40  
INSTRUM spect  
PROBHD 5 mm PABBO BB-  
PULPROG zg30  
TD 65536  
SOLVENT DMSO  
NS 64  
DS 2  
SWH 6024.096 Hz  
FIDRES 0.091920 Hz  
AQ 5.4394879 sec  
RG 158.22  
DW 83.000 usec  
DE 6.50 usec  
TE 0 K  
D1 1.00000000 sec  
TD0 1

===== CHANNEL f1 =====  
SF01 300.8484063 MHz  
NUC1 1H  
P1 15.00 usec  
PLW1 6.40000010 W

F2 - Processing parameters  
SI 65536  
SF 300.8465480 MHz  
WDW EM  
SSB 0  
LB 0.30 Hz  
GB 0  
PC 1.00

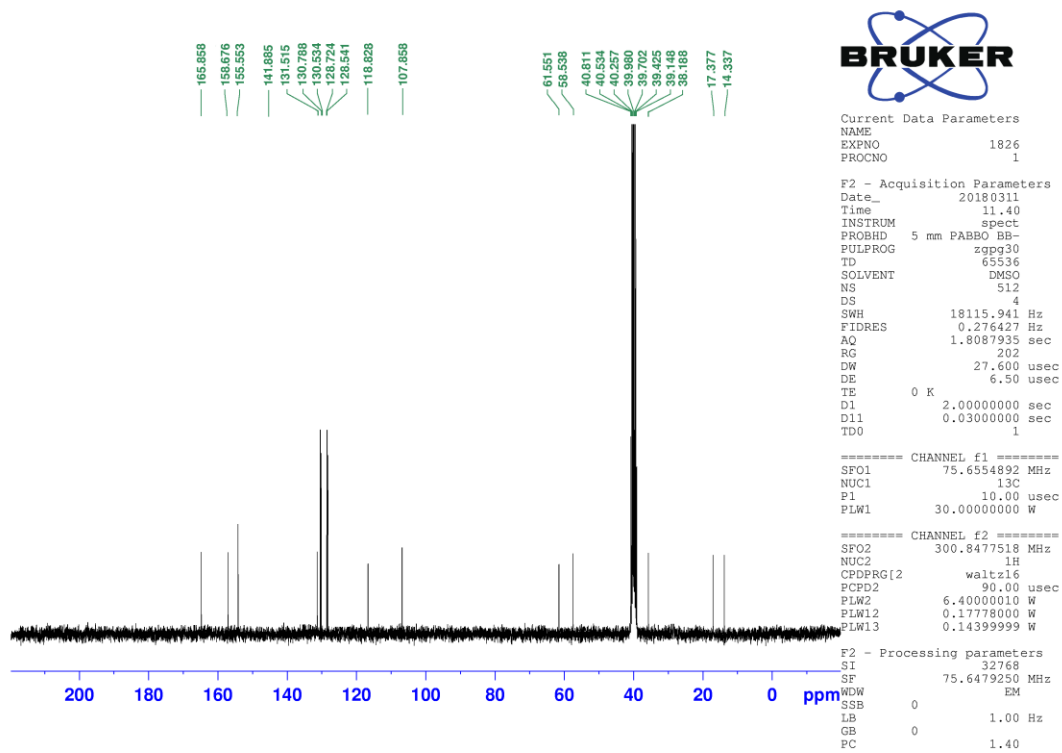

**Spectral data of ethyl 6-amino-4-(4-bromophenyl)-5-cyano-2-methyl-4H-pyran-3-carboxylate (Table 3, entry 3):**

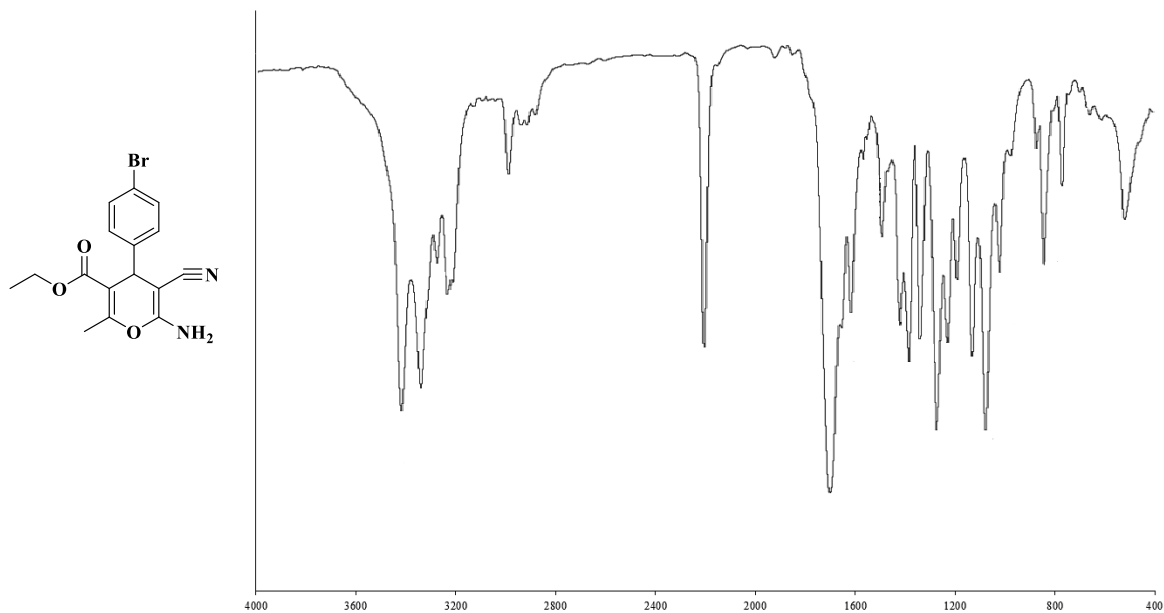

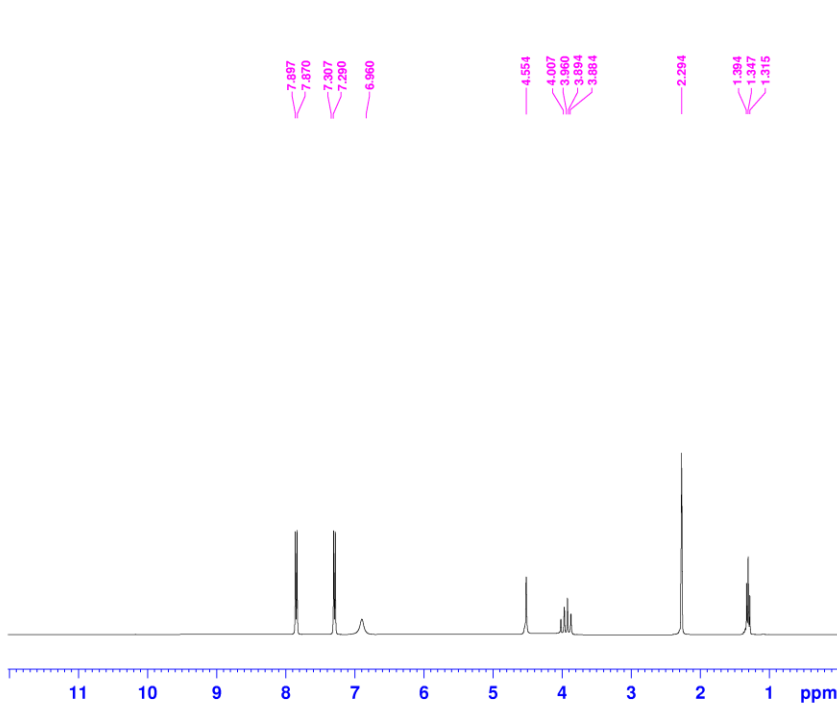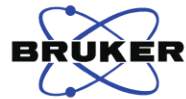

Current Data Parameters  
 NAME  
 EXPNO 1367  
 PROCNO 1

F2 - Acquisition Parameters  
 Date\_ 20180311  
 Time 16.40  
 INSTRUM spect  
 PROBHD 5 mm PABBO BB-  
 PULPROG zg30  
 TD 65536  
 SOLVENT DMSO  
 NS 64  
 DS 2  
 SWH 6024.096 Hz  
 FIDRES 0.091920 Hz  
 AQ 5.4394879 sec  
 RG 158.22  
 DW 83.000 usec  
 DE 6.50 usec  
 TE 0 K  
 D1 1.00000000 sec  
 TD0 1

===== CHANNEL f1 =====  
 SF01 300.8484063 MHz  
 NUC1 1H  
 P1 15.00 usec  
 PLW1 6.40000010 W

F2 - Processing parameters  
 SI 65536  
 SF 300.8465480 MHz  
 WDW EM  
 SSB 0  
 LB 0.30 Hz  
 GB 0  
 PC 1.00

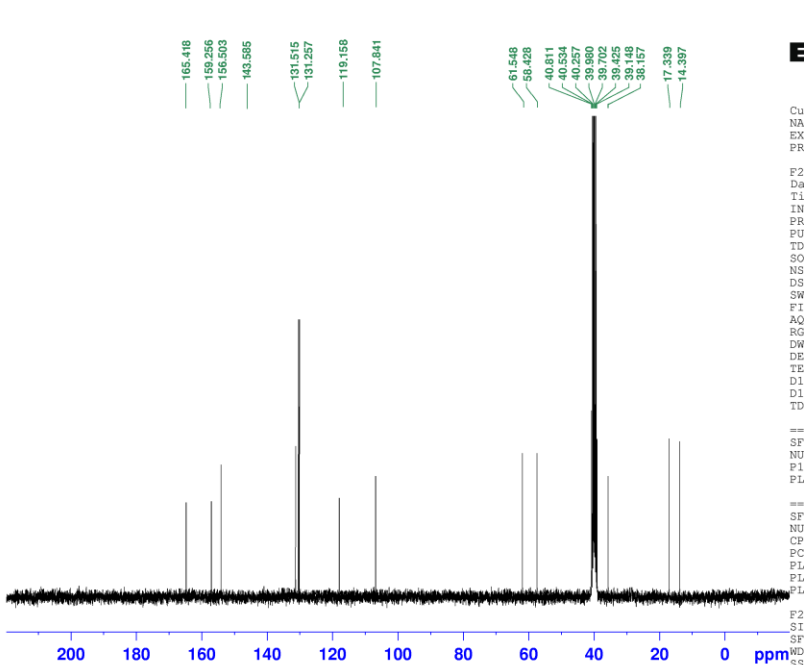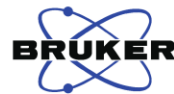

Current Data Parameters  
 NAME  
 EXPNO 1826  
 PROCNO 1

F2 - Acquisition Parameters  
 Date\_ 20180311  
 Time 17.40  
 INSTRUM spect  
 PROBHD 5 mm PABBO BB-  
 PULPROG zgpg30  
 TD 65536  
 SOLVENT DMSO  
 NS 512  
 DS 4  
 SWH 18115.941 Hz  
 FIDRES 0.276427 Hz  
 AQ 1.8087935 sec  
 RG 202  
 DW 27.600 usec  
 DE 6.50 usec  
 TE 0 K  
 D1 2.00000000 sec  
 D11 0.03000000 sec  
 TD0 1

===== CHANNEL f1 =====  
 SF01 75.6554892 MHz  
 NUC1 13C  
 P1 10.00 usec  
 PLW1 30.00000000 W

===== CHANNEL f2 =====  
 SF02 300.8477518 MHz  
 NUC2 1H  
 CPDPRG2 waltz16  
 ECPD2 90.00 usec  
 PLW2 6.40000010 W  
 PLM12 0.17778000 W  
 PLM13 0.14399999 W

F2 - Processing parameters  
 SI 32768  
 SF 75.6479250 MHz  
 WDW EM  
 SSB 0  
 LB 1.00 Hz  
 GB 0  
 PC 1.40

ethyl 6-amino-5-cyano-4-(4-hydroxyphenyl)-2-methyl-4H-pyran-3-carboxylate (Table 3, entry 4):

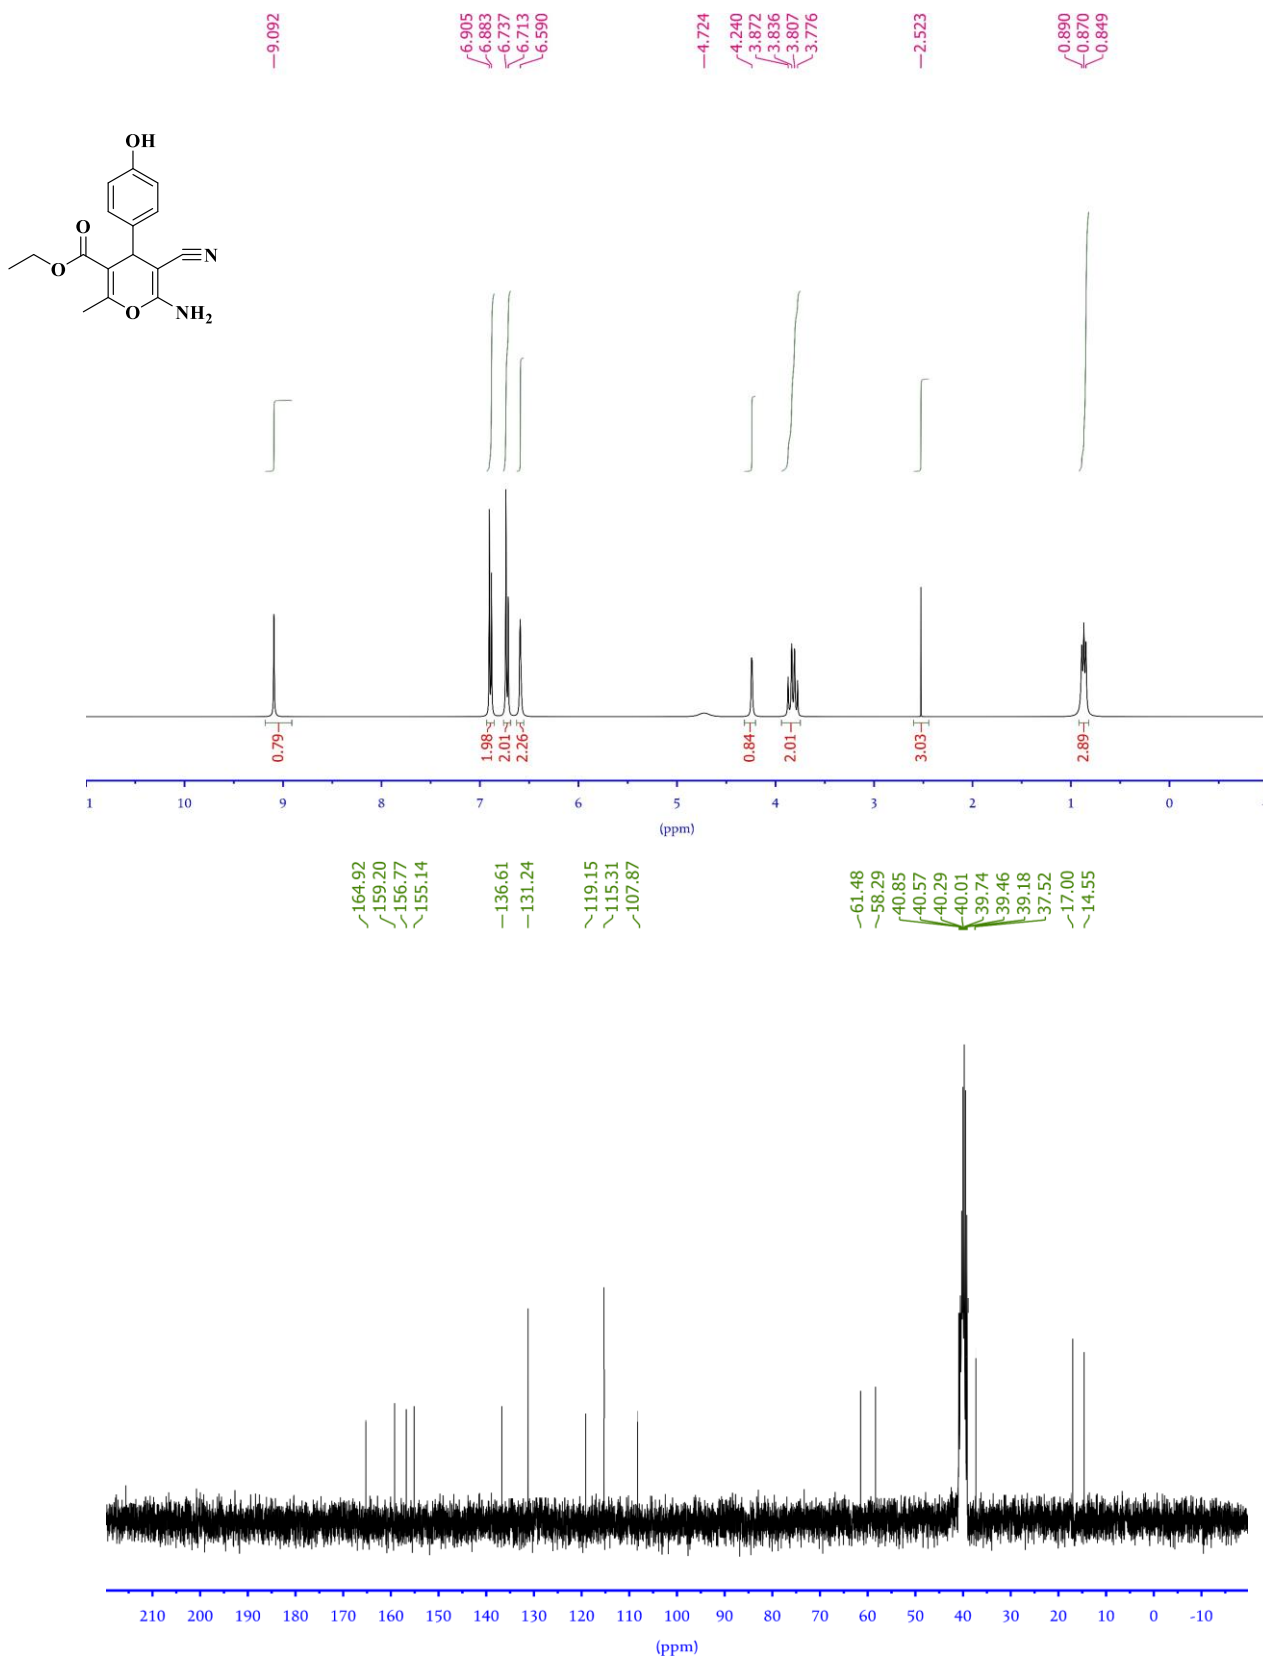

ethyl 6-amino-5-cyano-4-(4-methoxyphenyl)-2-methyl-4H-pyran-3-carboxylate (Table 3, entry 5):

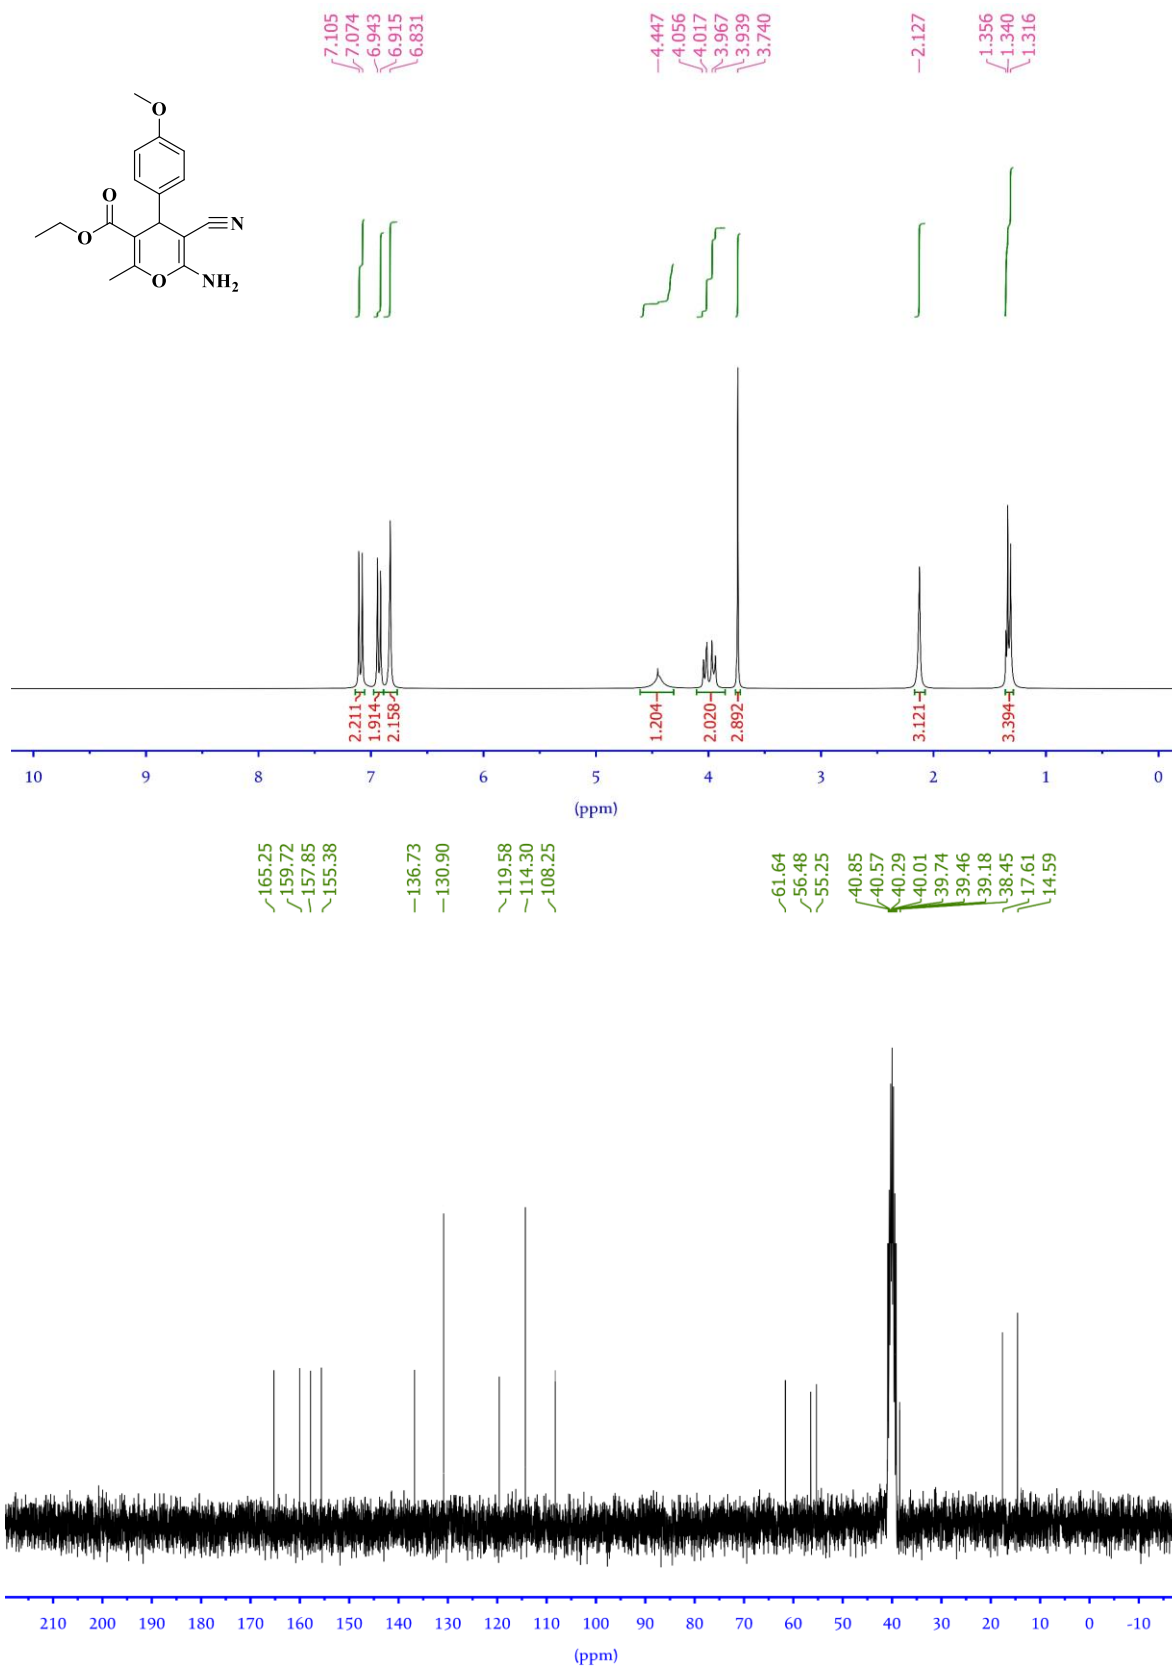



ethyl 6-amino-5-cyano-2-methyl-4-(p-tolyl)-4H-pyran-3-carboxylate (Table 3, entry 6):

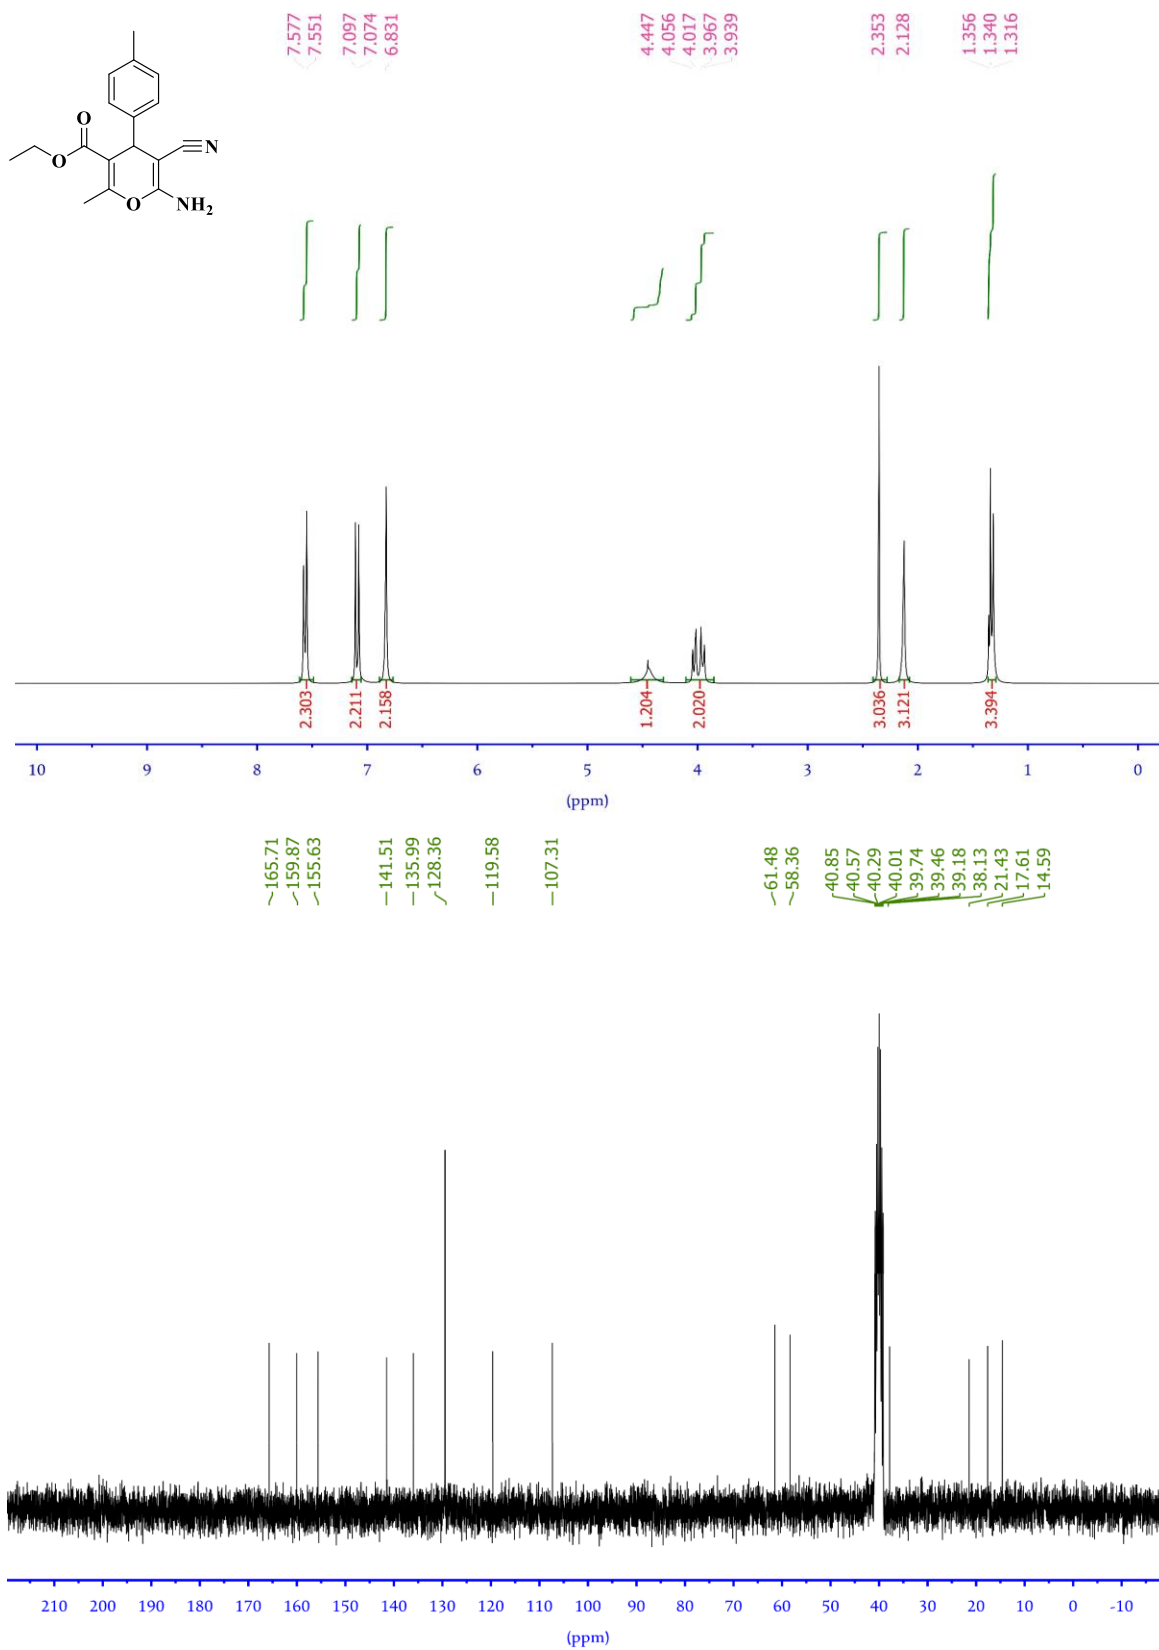

ethyl 6-amino-5-cyano-4-(4-fluorophenyl)-2-methyl-4H-pyran-3-carboxylate (Table 3, entry 7):

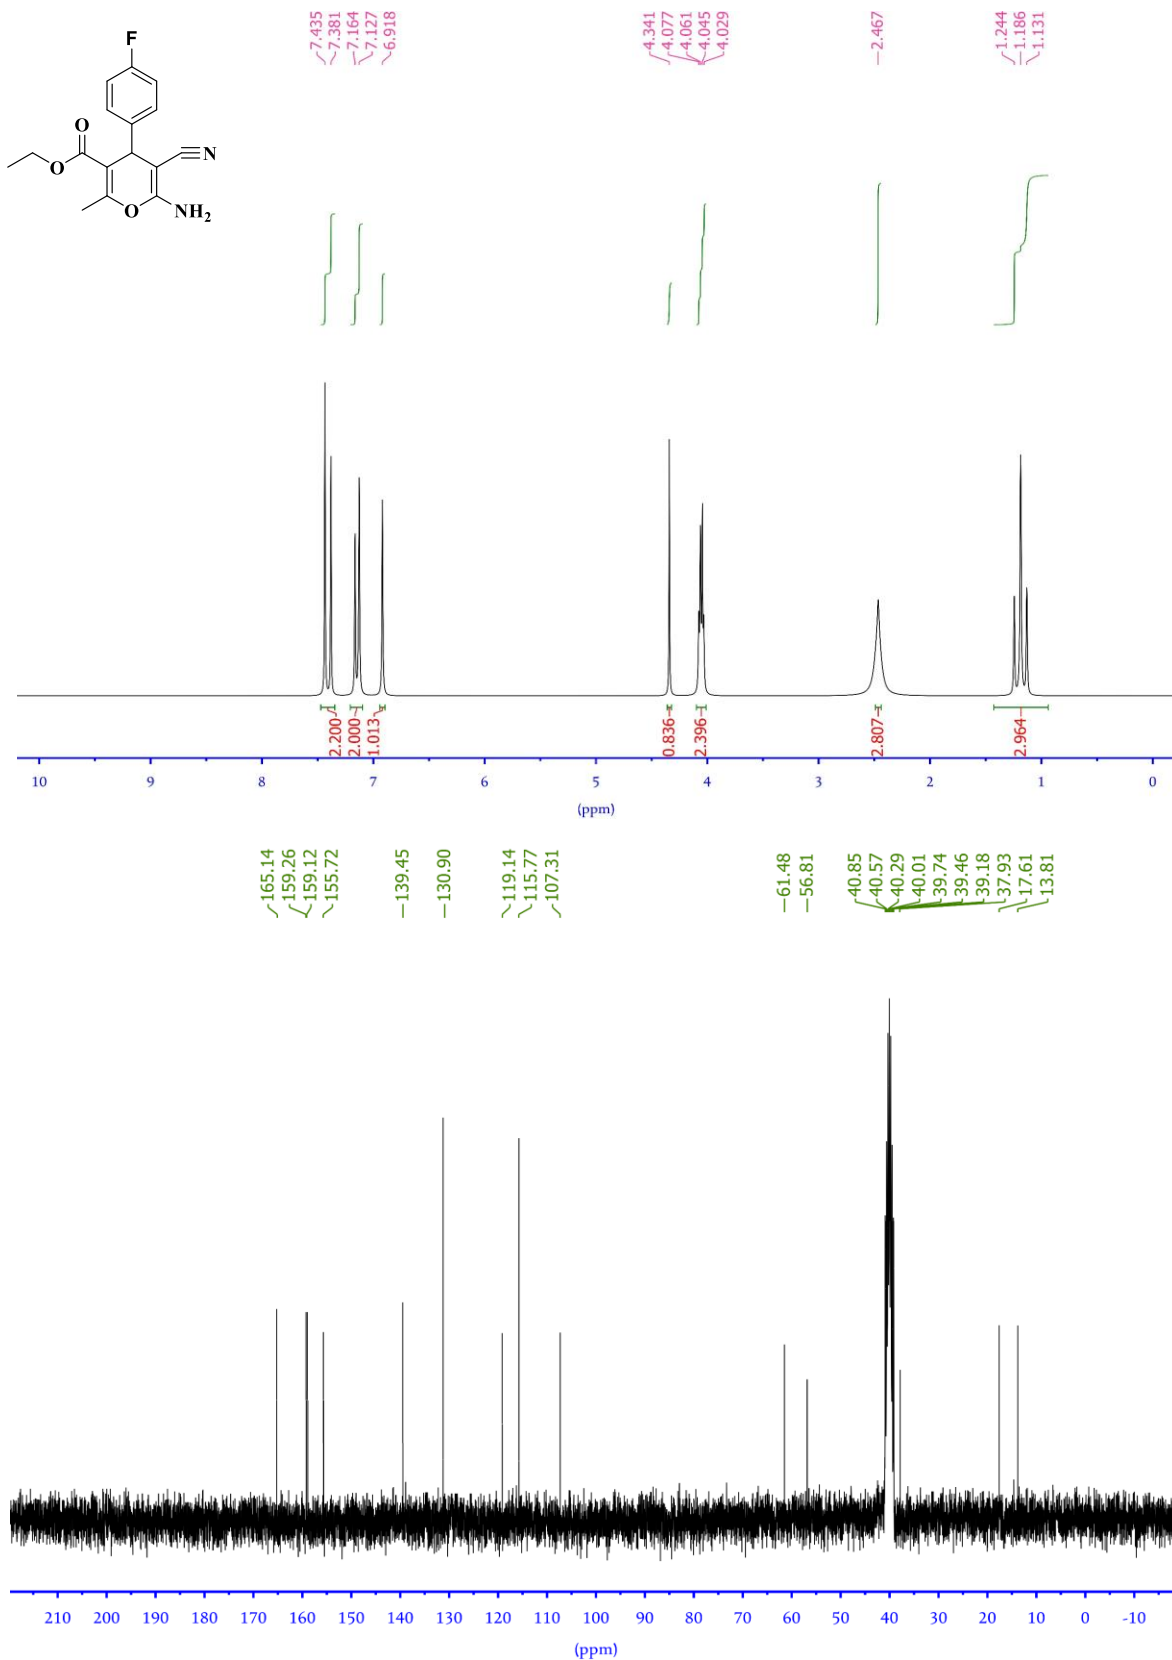

ethyl 6-amino-5-cyano-2-methyl-4-(4-nitrophenyl)-4H-pyran-3-carboxylate (Table 3, entry 8):

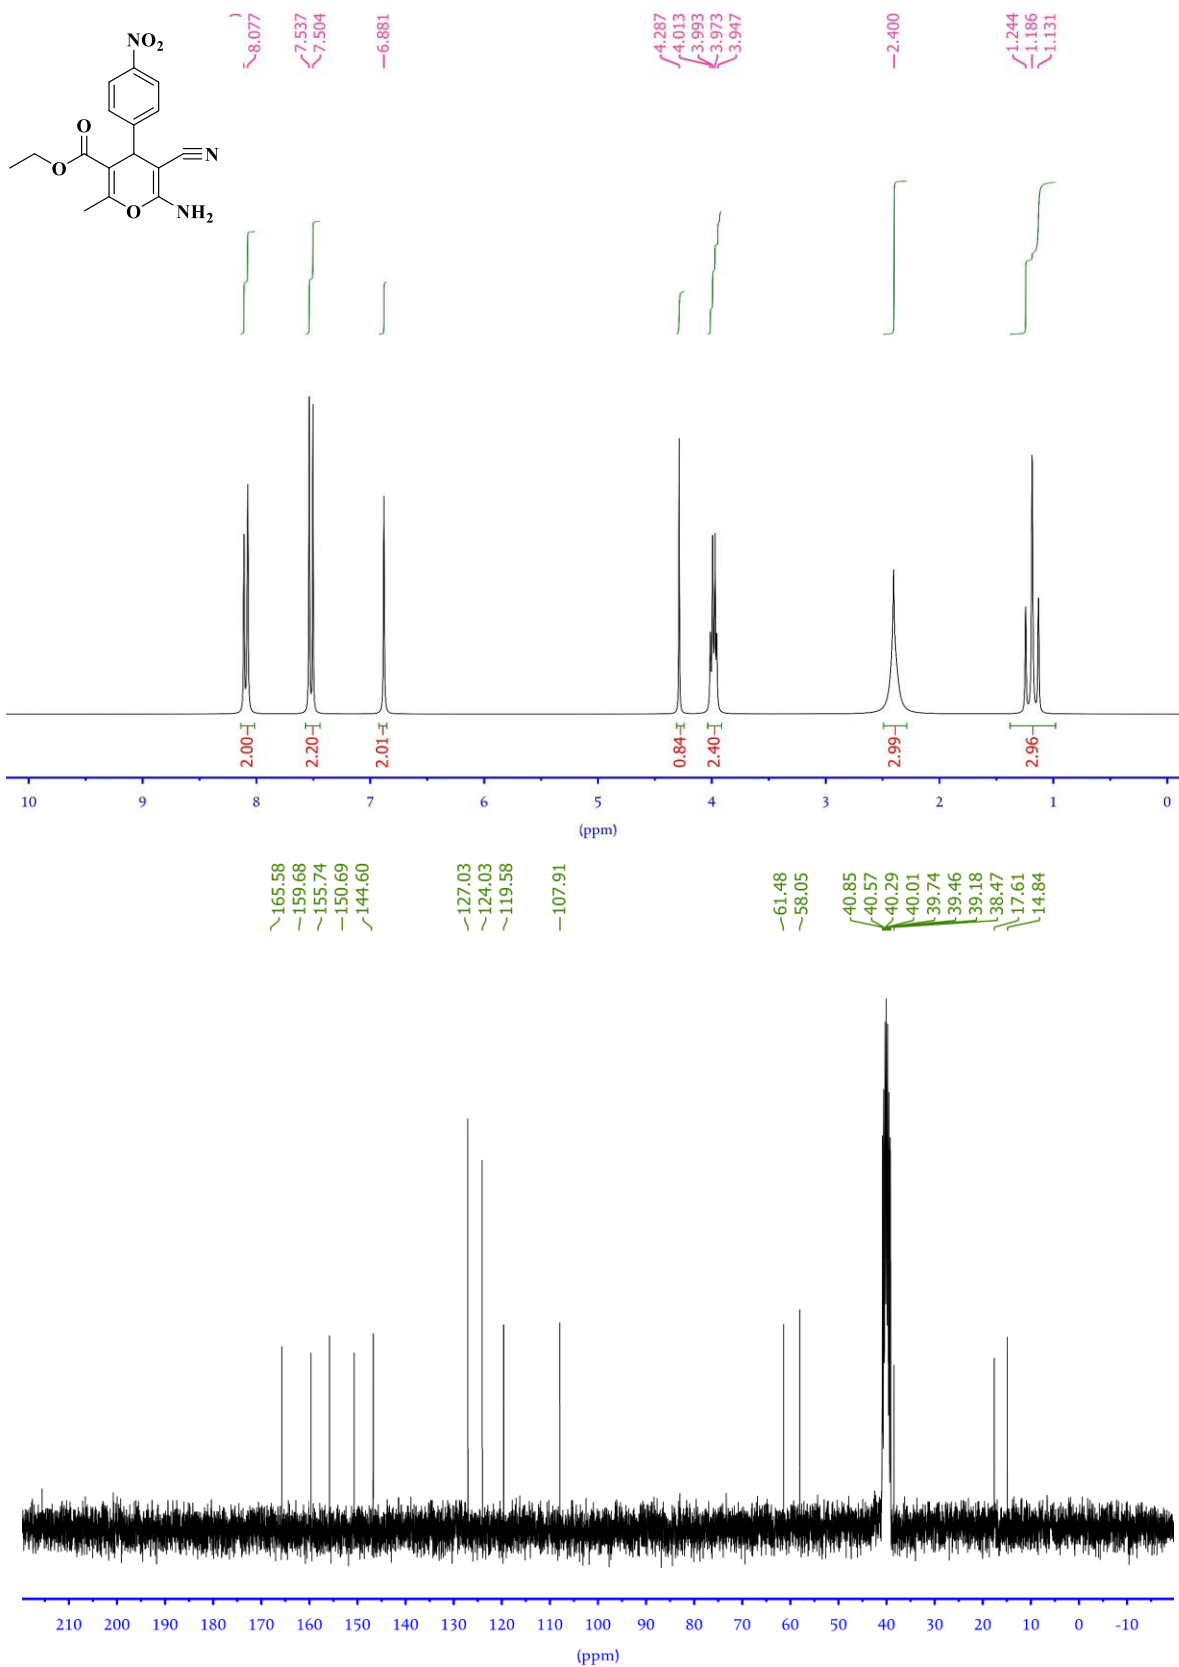

ethyl 6-amino-5-cyano-2-methyl-4-(3-nitrophenyl)-4H-pyran-3-carboxylate (Table 3, entry 9):

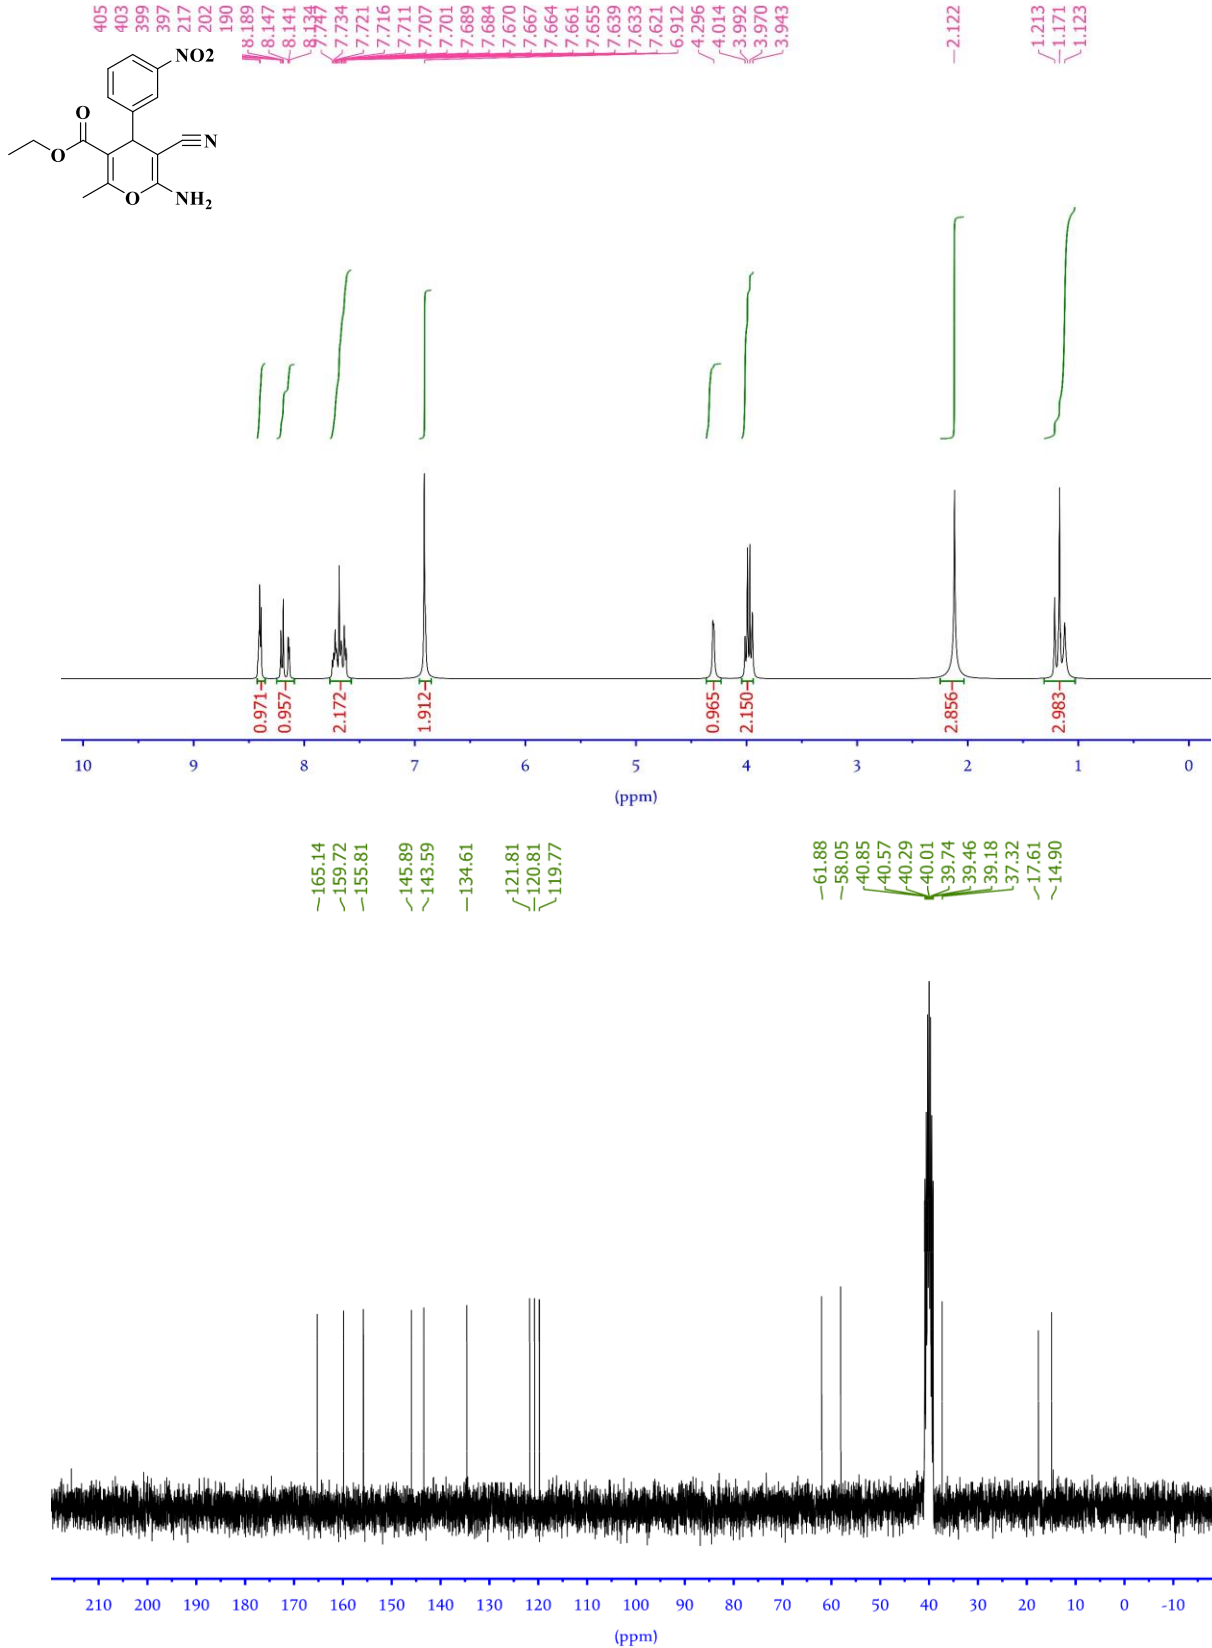

ethyl 6-amino-5-cyano-2-methyl-4-(2-nitrophenyl)-4H-pyran-3-carboxylate (Table 3, entry 10):

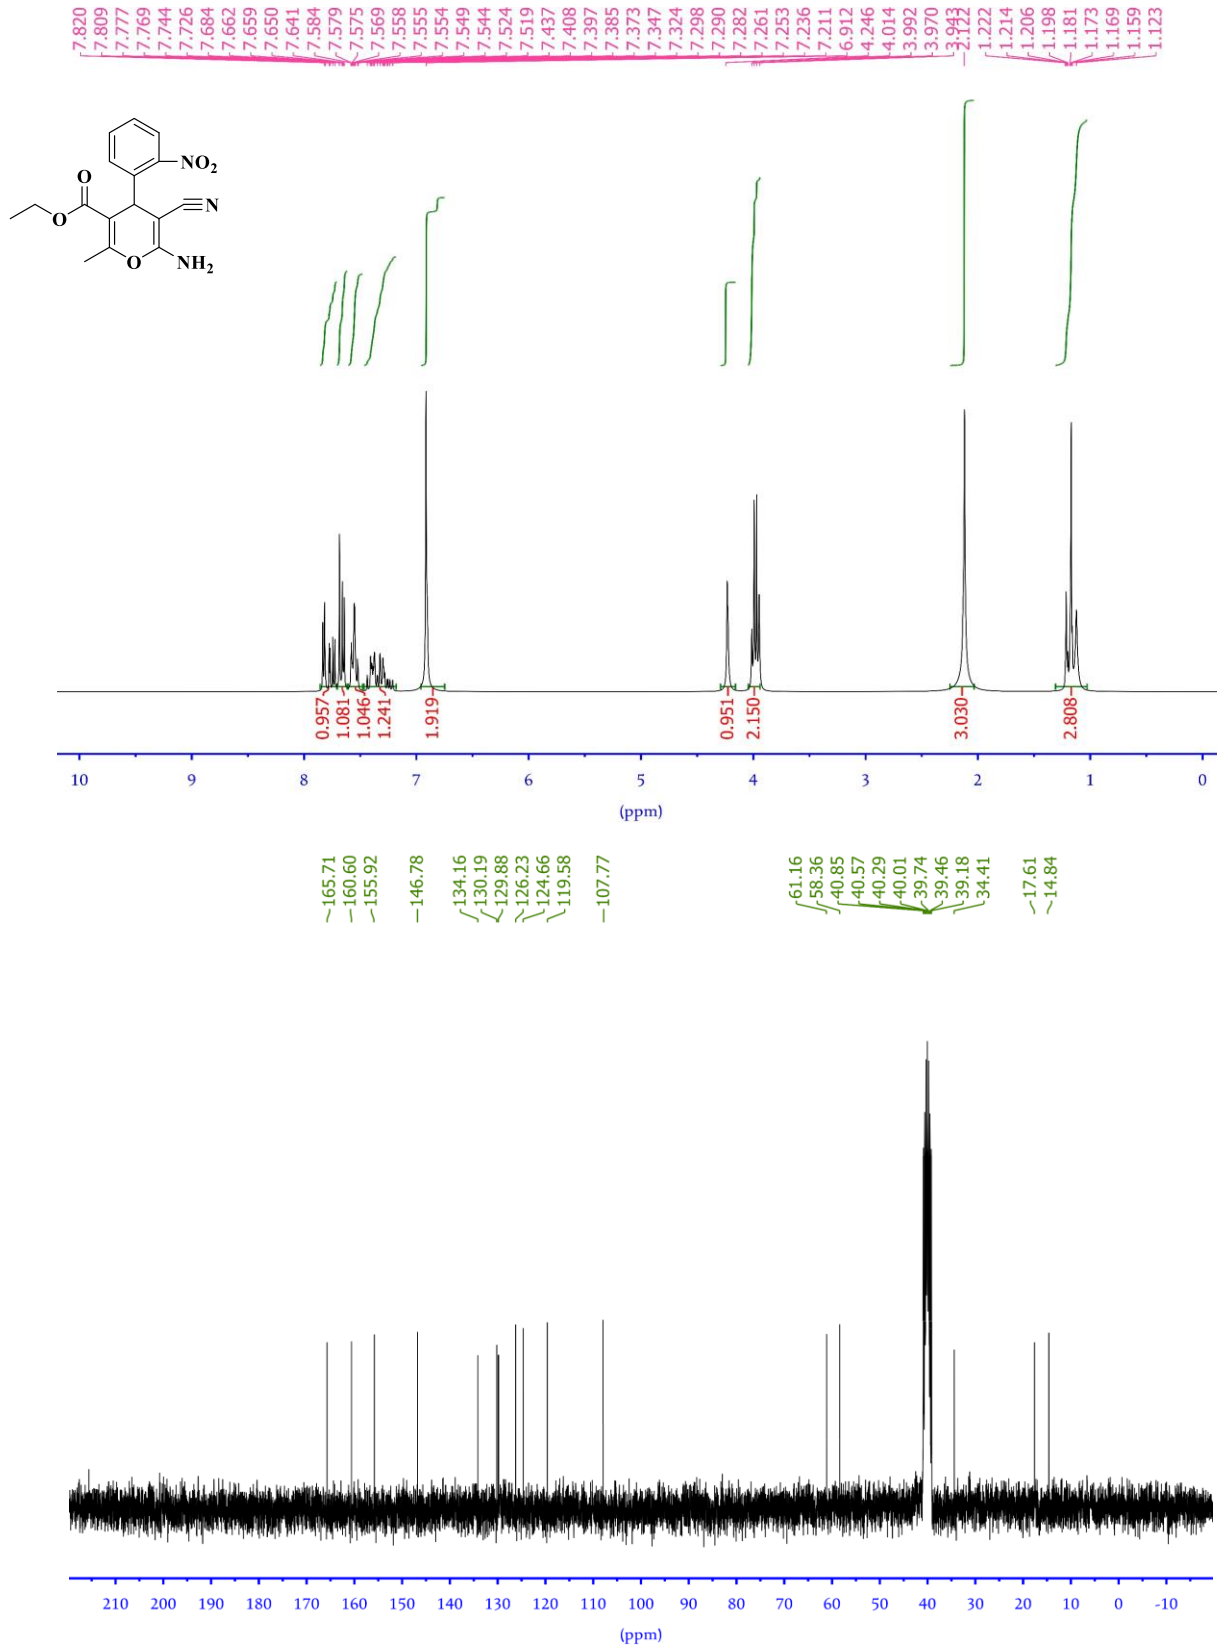

ethyl 6-amino-4-(2-chlorophenyl)-5-cyano-2-methyl-4H-pyran-3-carboxylate (Table 3, entry 11):

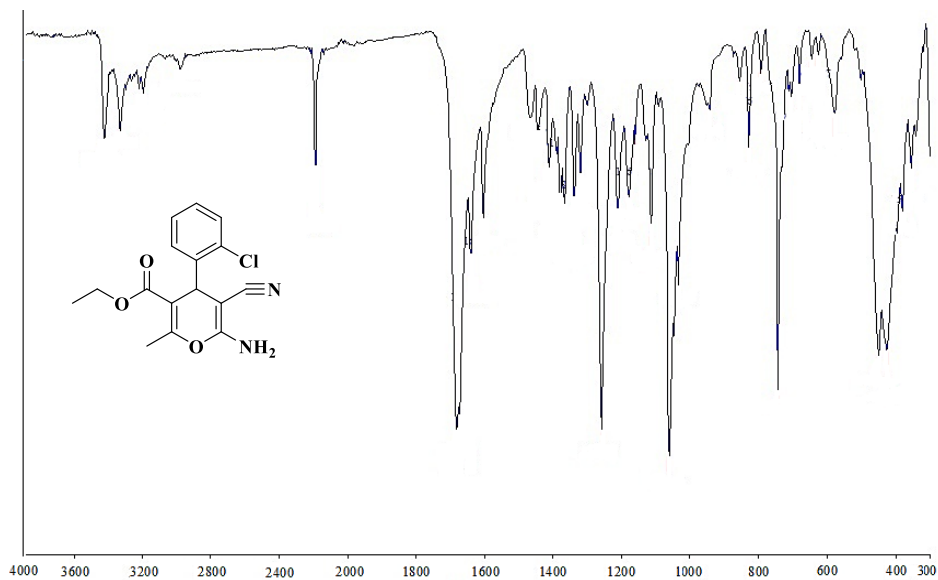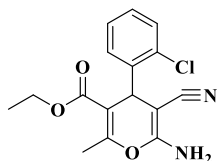

7.144  
7.132  
7.126  
7.115  
7.108  
7.099  
7.088  
7.007  
6.997  
6.990  
6.987  
6.970  
6.944  
6.748  
4.874  
3.947  
3.920  
3.904  
3.784  
2.334  
0.915  
0.884  
0.847

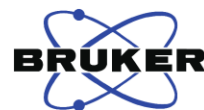

Current Data Parameters  
NAME  
EXPNO 1367  
PROCNO 1

F2 - Acquisition Parameters  
Date\_ 20180310  
Time 14.40  
INSTRUM spect  
PROBHD 5 mm PABBO BB-  
PULPROG zg30  
TD 65536  
SOLVENT DMSO  
NS 64  
DS 2  
SWH 6024.096 Hz  
FIDRES 0.091920 Hz  
AQ 5.4394879 sec  
RG 158.22  
DW 83.000 usec  
DE 6.50 usec  
TE 0 K  
D1 1.00000000 sec  
TD0 1

===== CHANNEL f1 =====  
SFO1 300.8484063 MHz  
NUC1 1H  
P1 15.00 usec  
PLW1 6.40000010 W

F2 - Processing parameters  
SI 65536  
SF 300.8465480 MHz  
WDW EM  
SSB 0  
LB 0.30 Hz  
GB 0  
PC 1.00

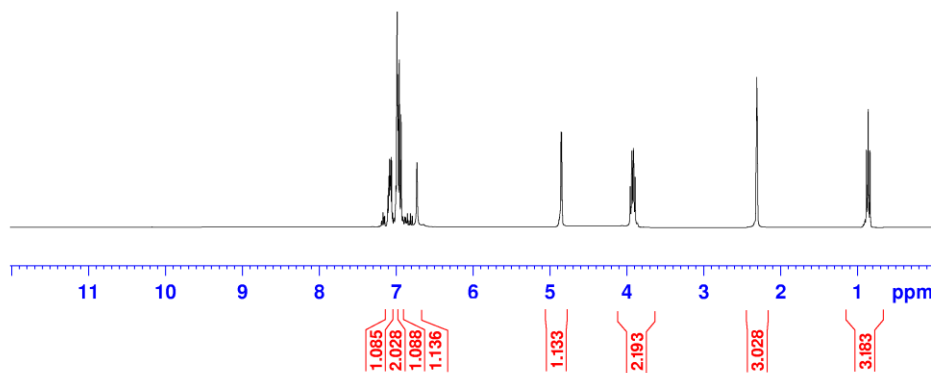

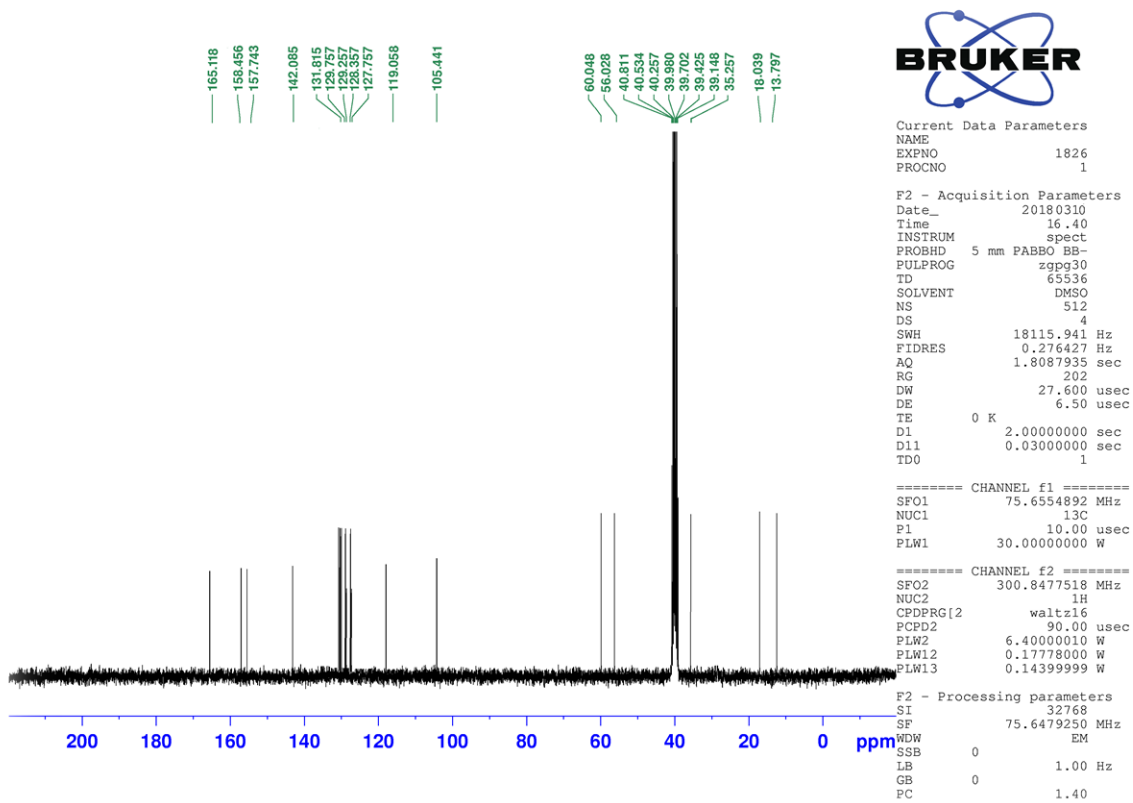

ethyl 6-amino-4-(2-bromophenyl)-5-cyano-2-methyl-4H-pyran-3-carboxylate (Table 3, entry 12):

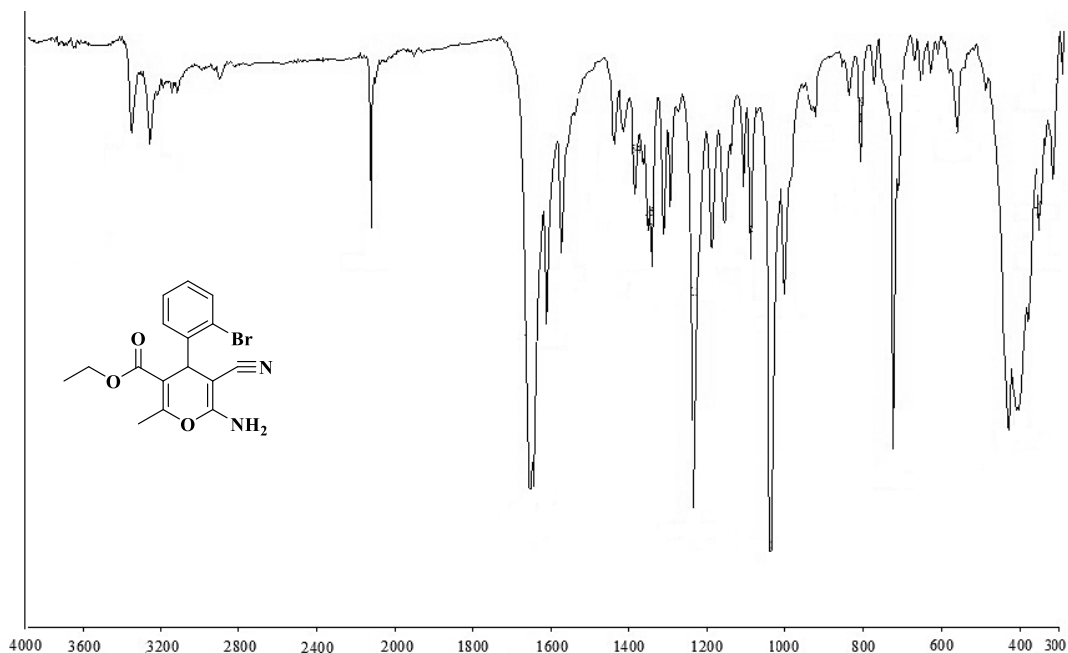

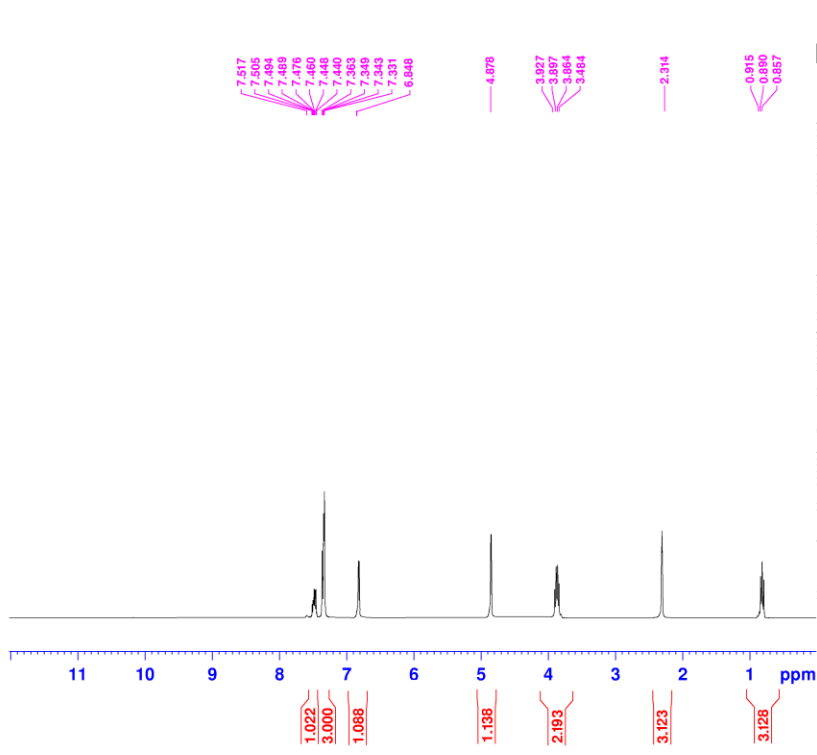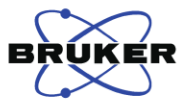

Current Data Parameters  
 NAME  
 EXPNO 1367  
 PROCNO 1

F2 - Acquisition Parameters  
 Date\_ 20180310  
 Time 11.30  
 INSTRUM spect  
 PROBHD 5 mm PABBO BB-  
 PULPROG zg30  
 TD 65536  
 SOLVENT DMSO  
 NS 64  
 DS 2  
 SWH 6024.096 Hz  
 FIDRES 0.091920 Hz  
 AQ 5.4394879 sec  
 RG 158.22  
 DW 83.000 usec  
 DE 6.50 usec  
 TE 0 K  
 D1 1.0000000 sec  
 TD0 1

==== CHANNEL f1 =====  
 SFO1 300.8484063 MHz  
 NUC1 1H  
 P1 15.00 usec  
 PLW1 6.40000010 W

F2 - Processing parameters  
 SI 6536  
 SF 300.8465480 MHz  
 WDW EM  
 SSB 0  
 LB 0.30 Hz  
 GB 0  
 PC 1.00

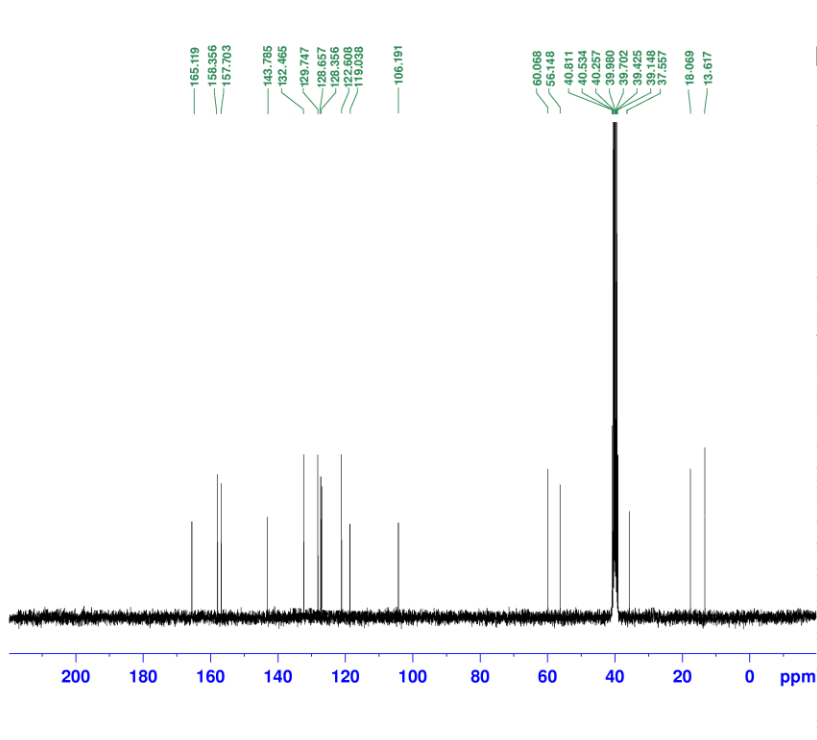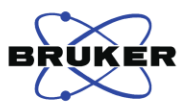

Current Data Parameters  
 NAME  
 EXPNO 1826  
 PROCNO 1

F2 - Acquisition Parameters  
 Date\_ 20180310  
 Time 13.30  
 INSTRUM spect  
 PROBHD 5 mm PABBO BB-  
 PULPROG zgpg30  
 TD 65536  
 SOLVENT DMSO  
 NS 512  
 DS 4  
 SWH 18115.941 Hz  
 FIDRES 0.276427 Hz  
 AQ 1.8087935 sec  
 RG 202  
 DW 27.600 usec  
 DE 6.50 usec  
 TE 0 K  
 D1 2.0000000 sec  
 D11 0.0300000 sec  
 TD0 1

==== CHANNEL f1 =====  
 SFO1 75.6554892 MHz  
 NUC1 13C  
 P1 10.00 usec  
 PLW1 30.00000000 W

==== CHANNEL f2 =====  
 SFO2 300.8477518 MHz  
 NUC2 1H  
 CPDPRG2 waltz16  
 PCPD2 90.00 usec  
 PLW2 6.40000010 W  
 PLW12 0.17778000 W  
 PLW13 0.14399999 W

F2 - Processing parameters  
 SI 32768  
 SF 75.6479250 MHz  
 WDW EM  
 SSB 0  
 LB 1.00 Hz  
 GB 0  
 PC 1.40



amino-3-methyl-4-phenyl-2,4-dihydropyrano[2,3-c] pyrazole-5-carbonitrile (Table 3, entry 13):

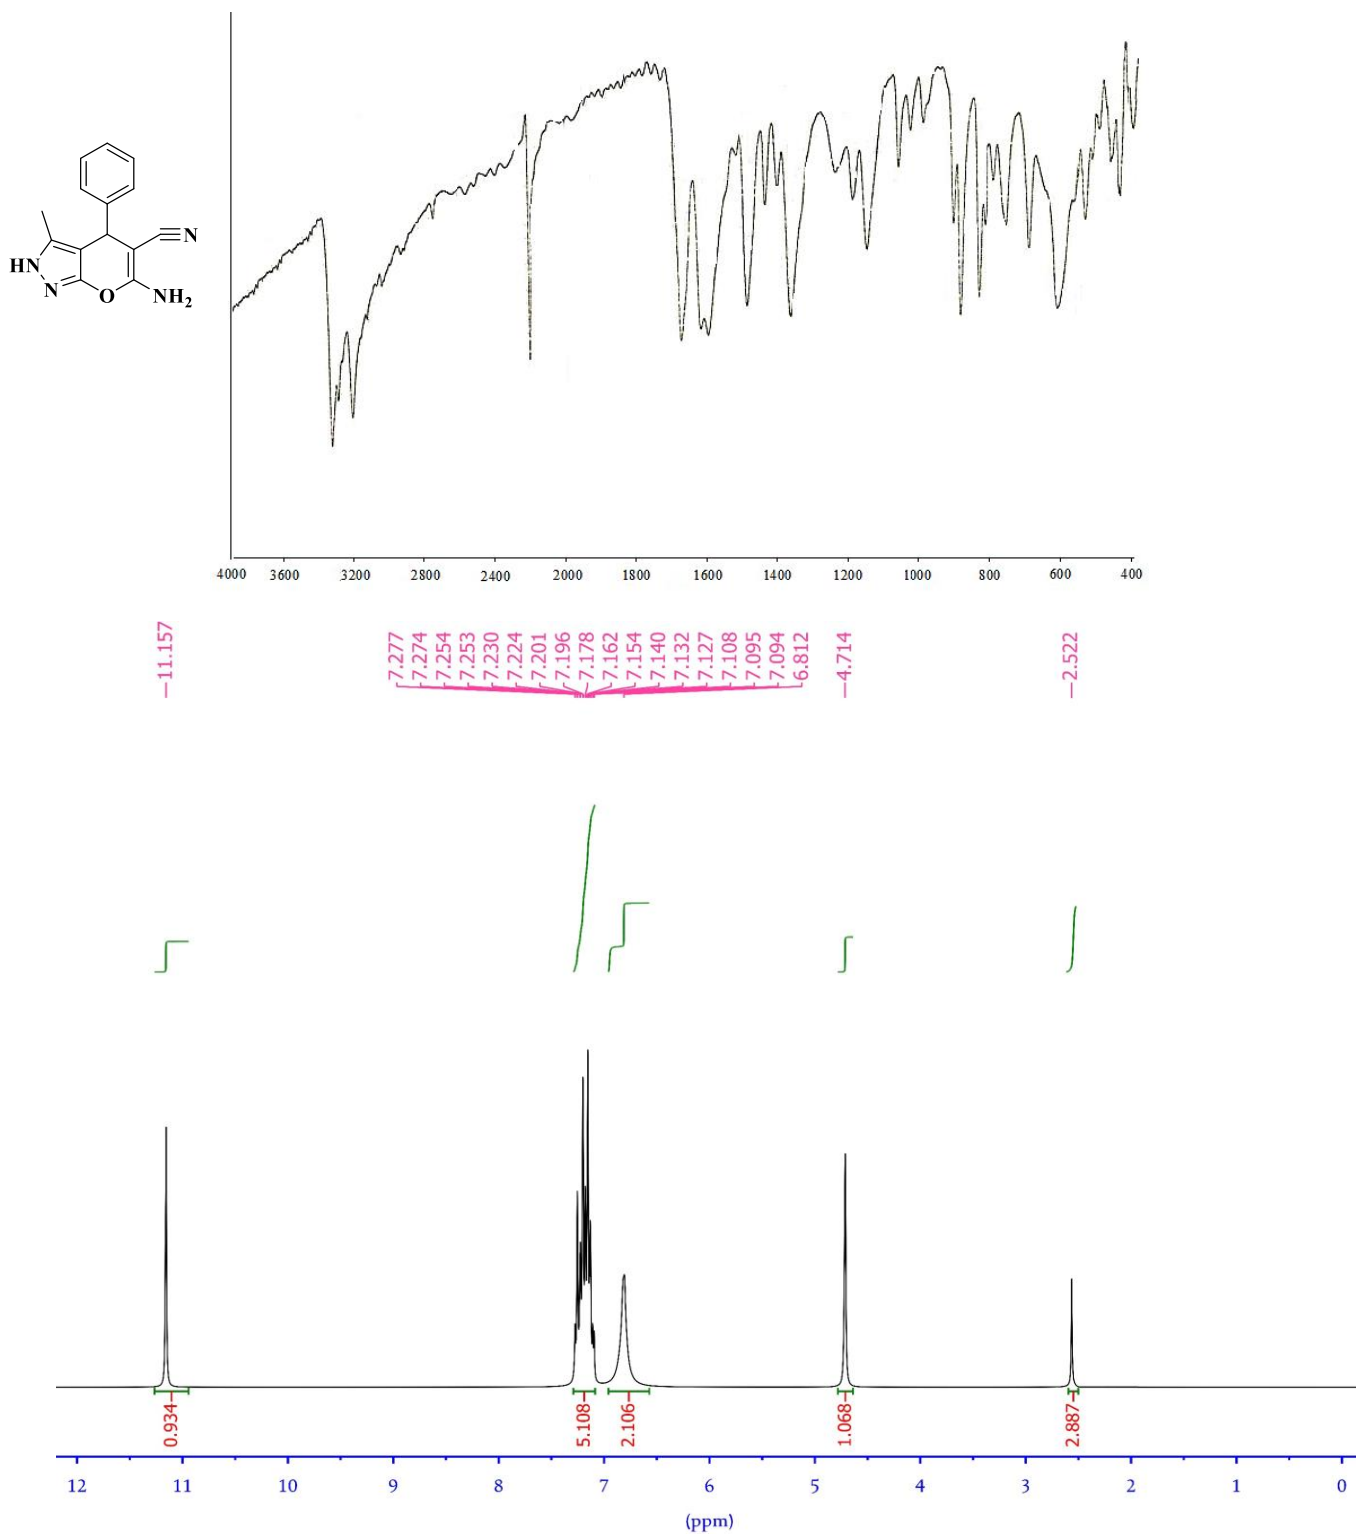

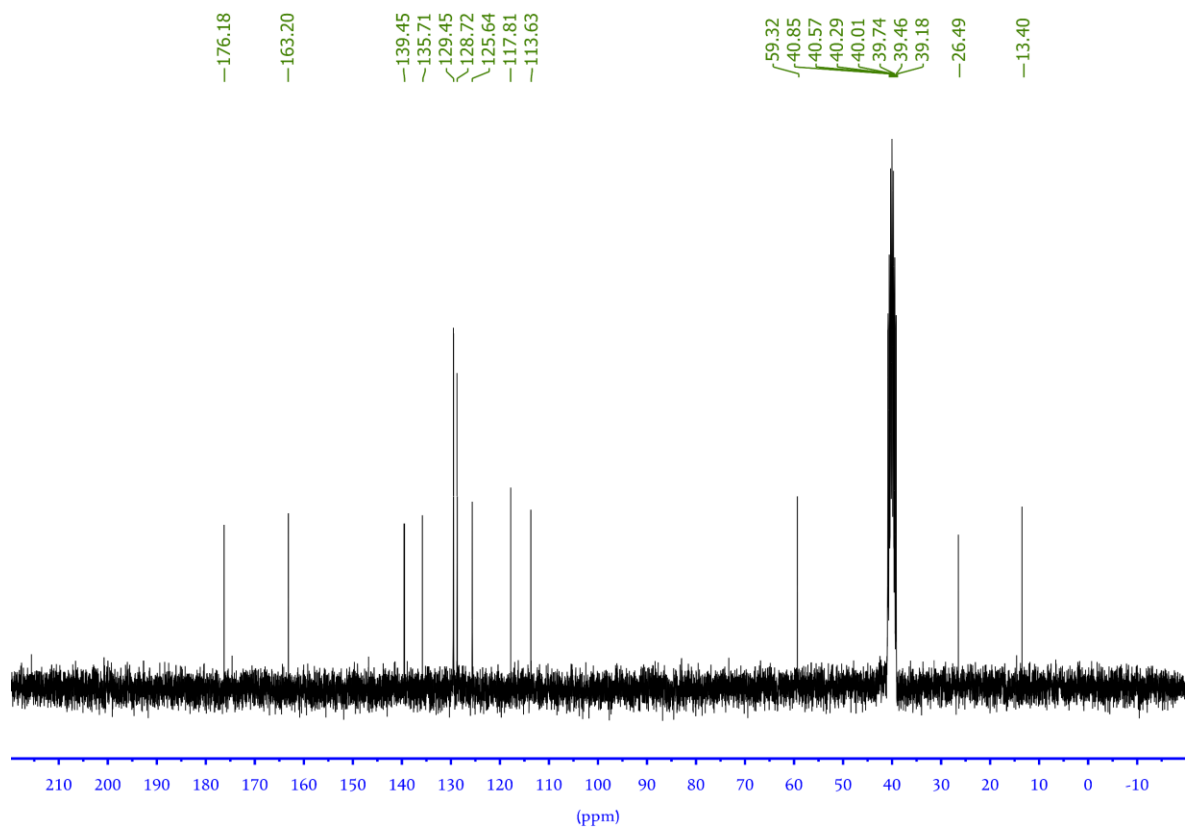

**6-amino-4-(4-chlorophenyl)-3-methyl-2,4-dihydropyrano[2,3-c]pyrazole-5-carbonitrile (Table 3, entry 14):**

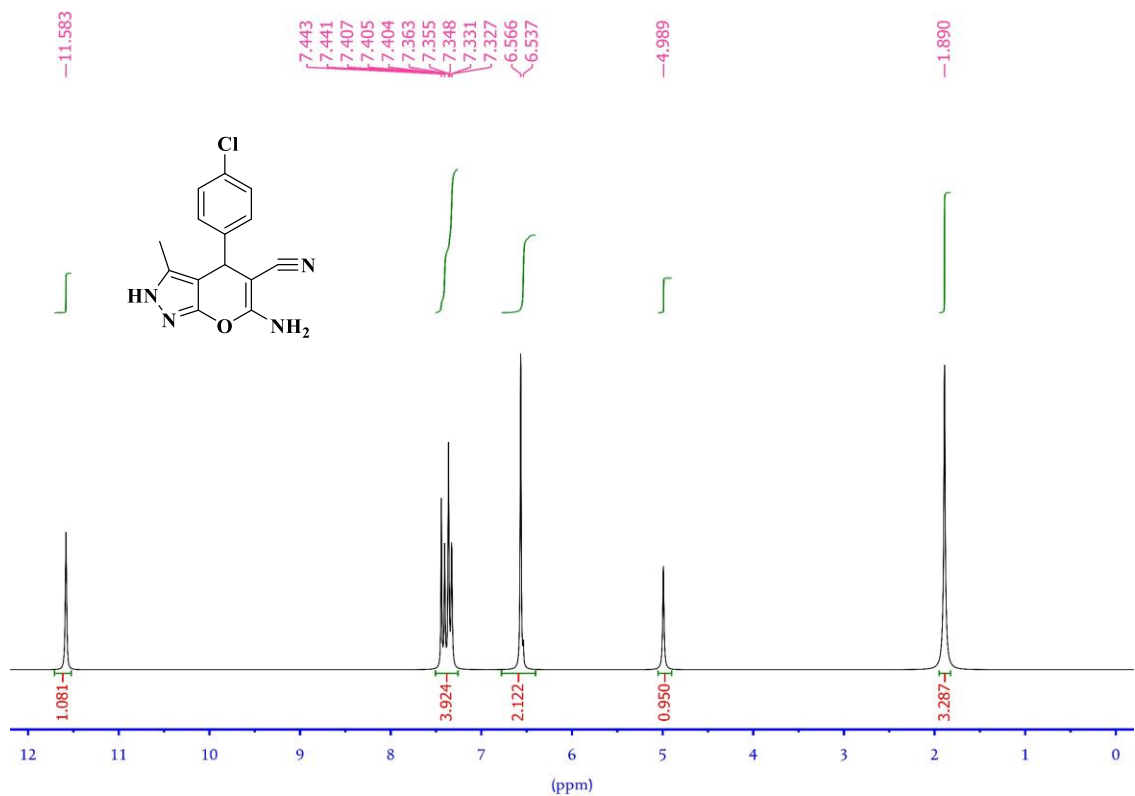

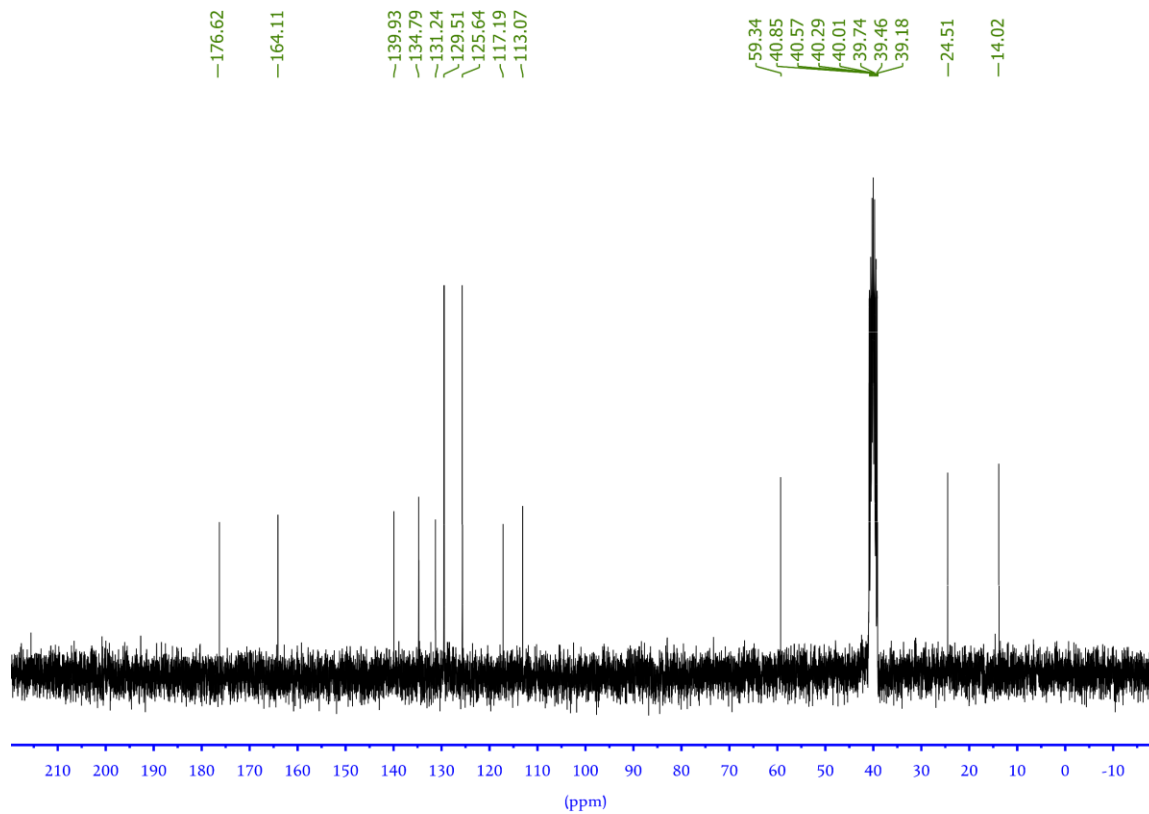

**6-amino-4-(4-bromophenyl)-3-methyl-2,4-dihydropyrano[2,3-c]pyrazole-5-carbonitrile (Table 3, entry 15):**

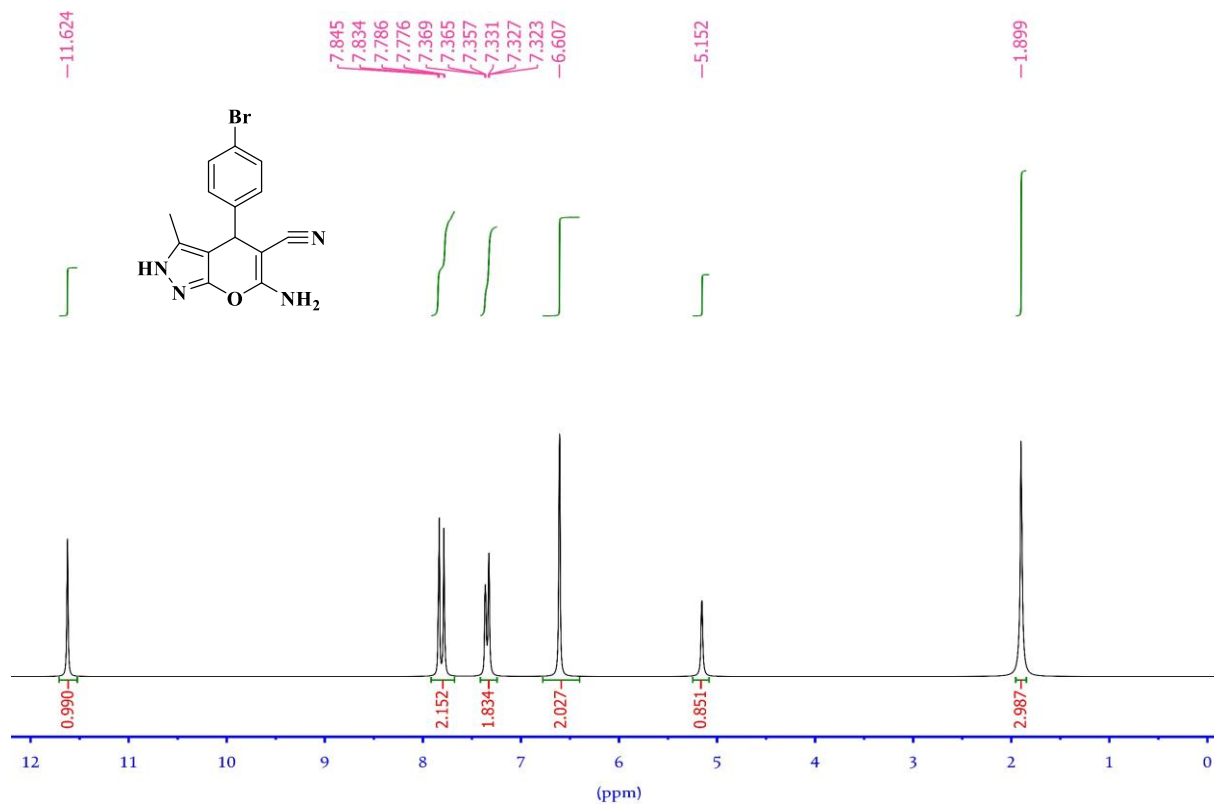

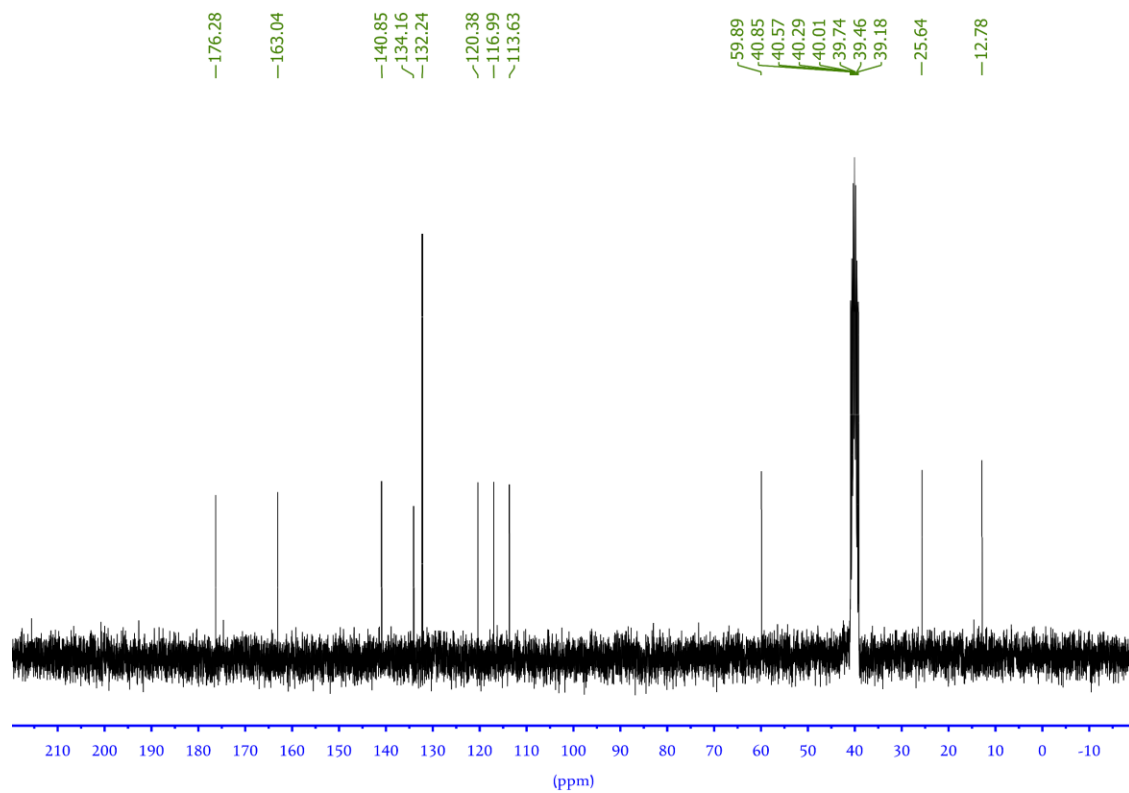

**6-amino-4-(4-hydroxyphenyl)-3-methyl-2,4-dihydroprano[2,3-c]pyrazole-5-carbonitrile (Table 3, entry 16):**

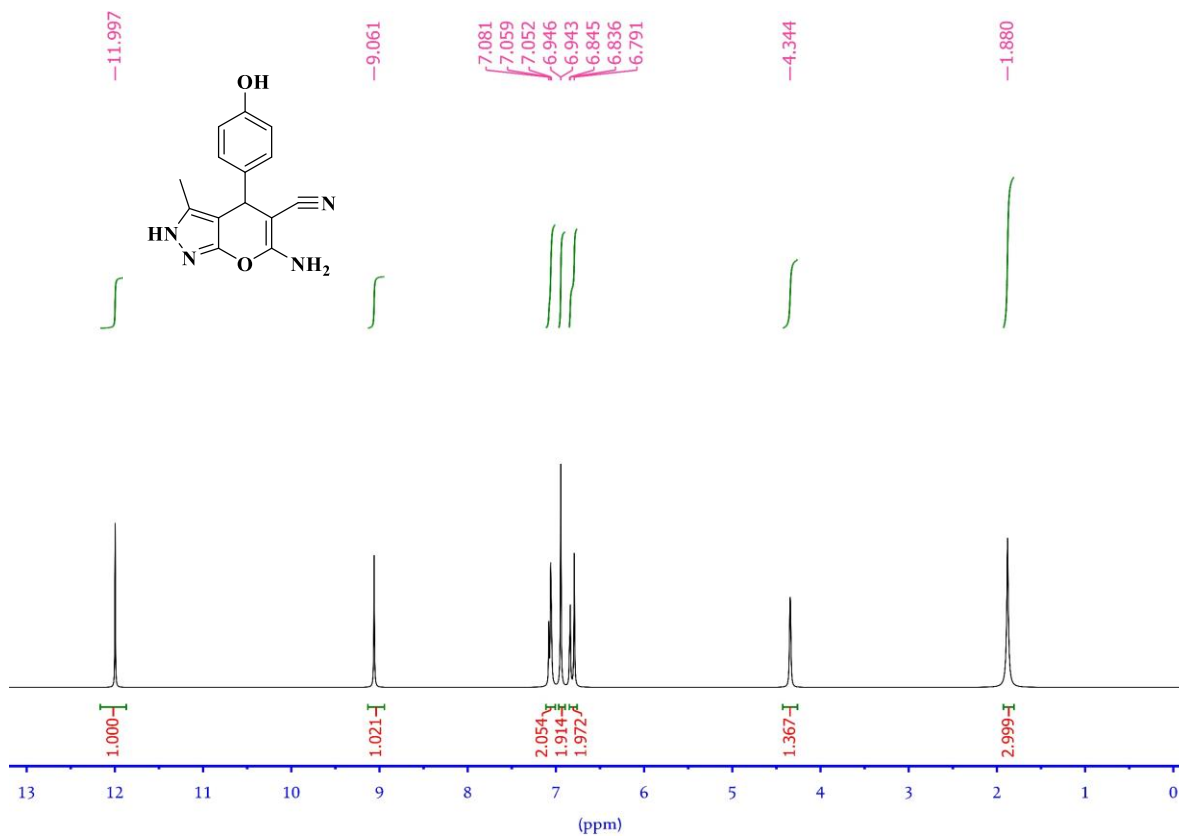

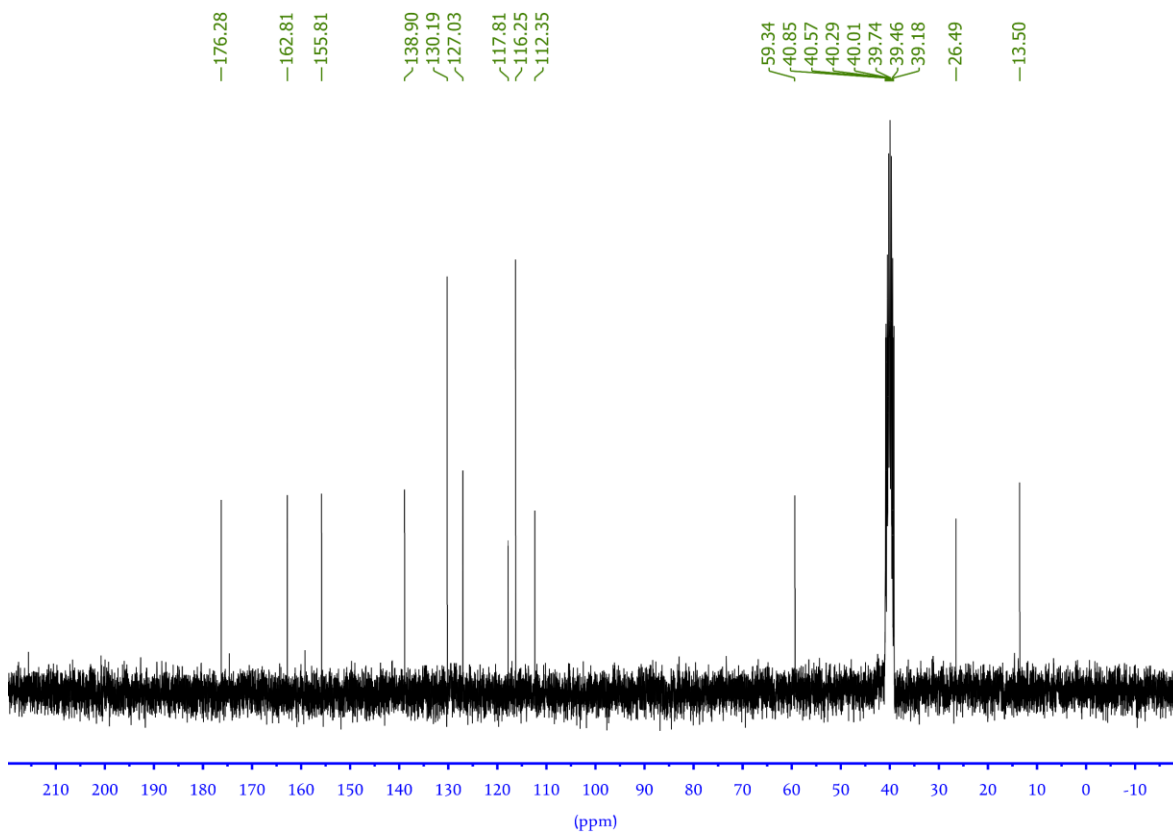

**6-amino-4-(4-methoxyphenyl)-3-methyl-2,4-dihydropyrano[2,3-c]pyrazole-5-carbonitrile (Table 3, entry 17):**

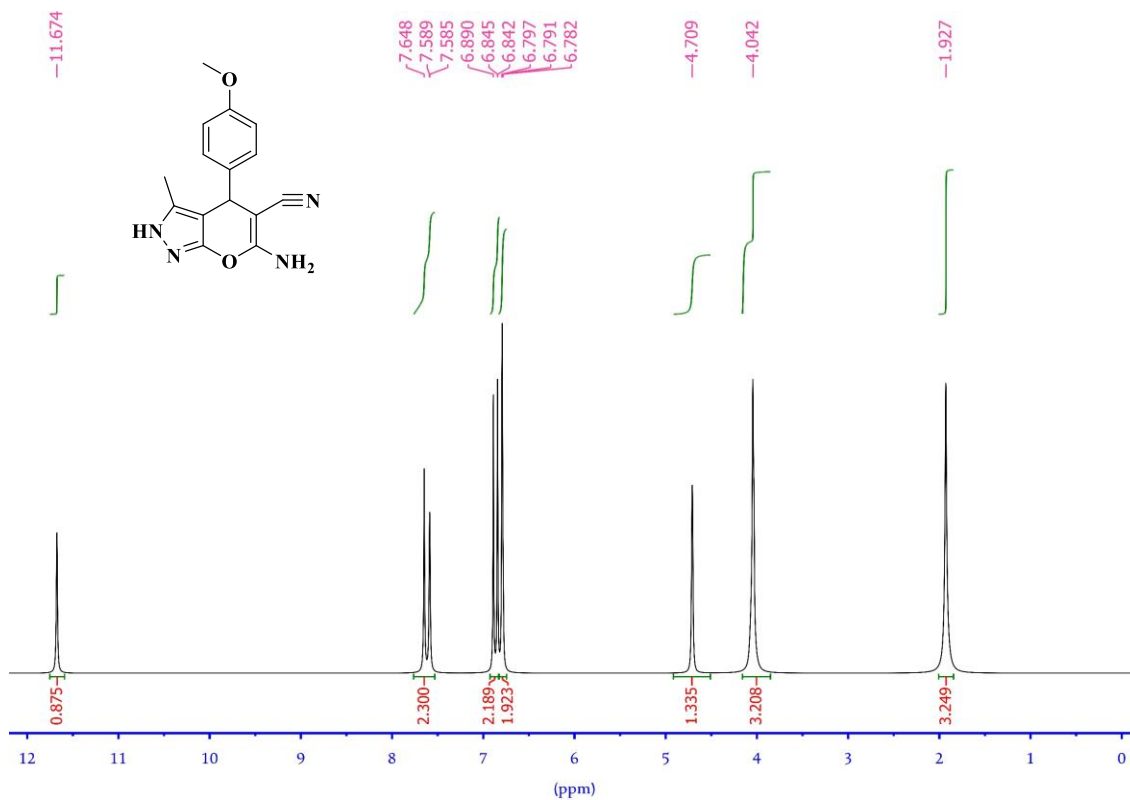

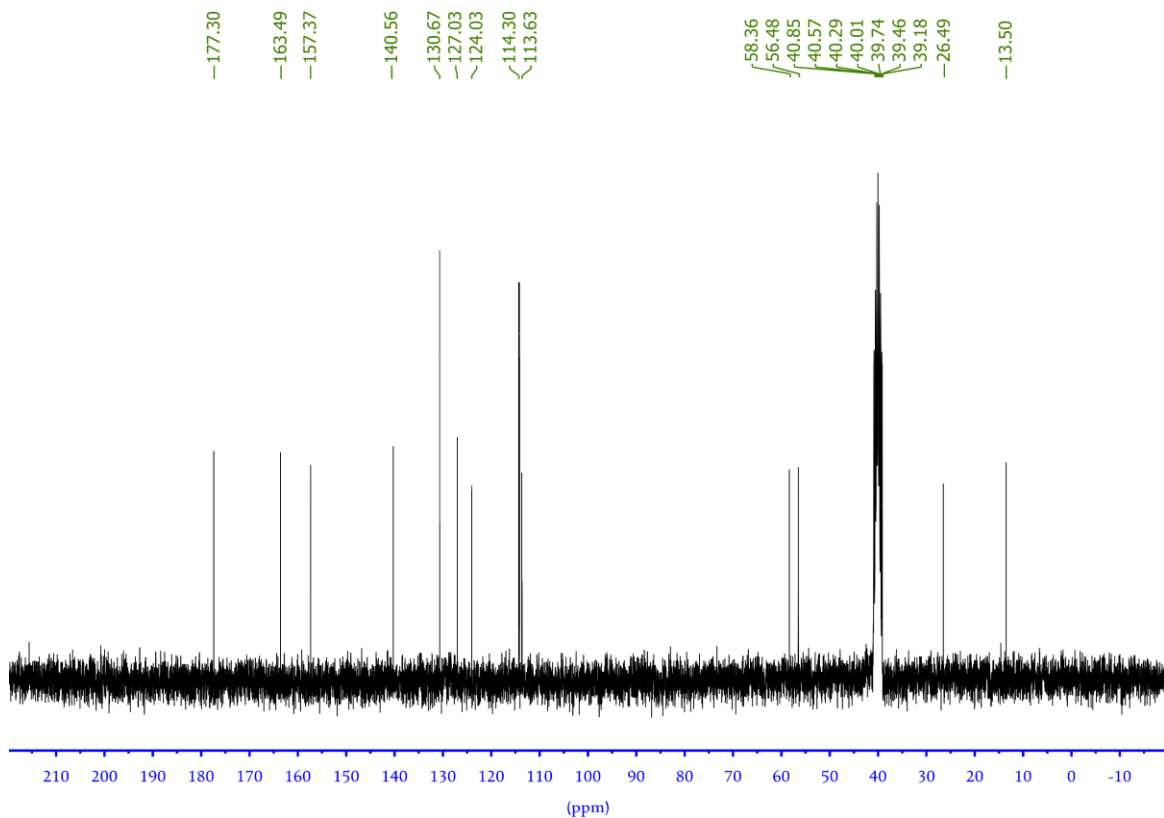

**6-amino-3-methyl-4-(p-tolyl)-2,4-dihydropyran[2,3-c]pyrazole-5-carbonitrile (Table 3, entry 18):**

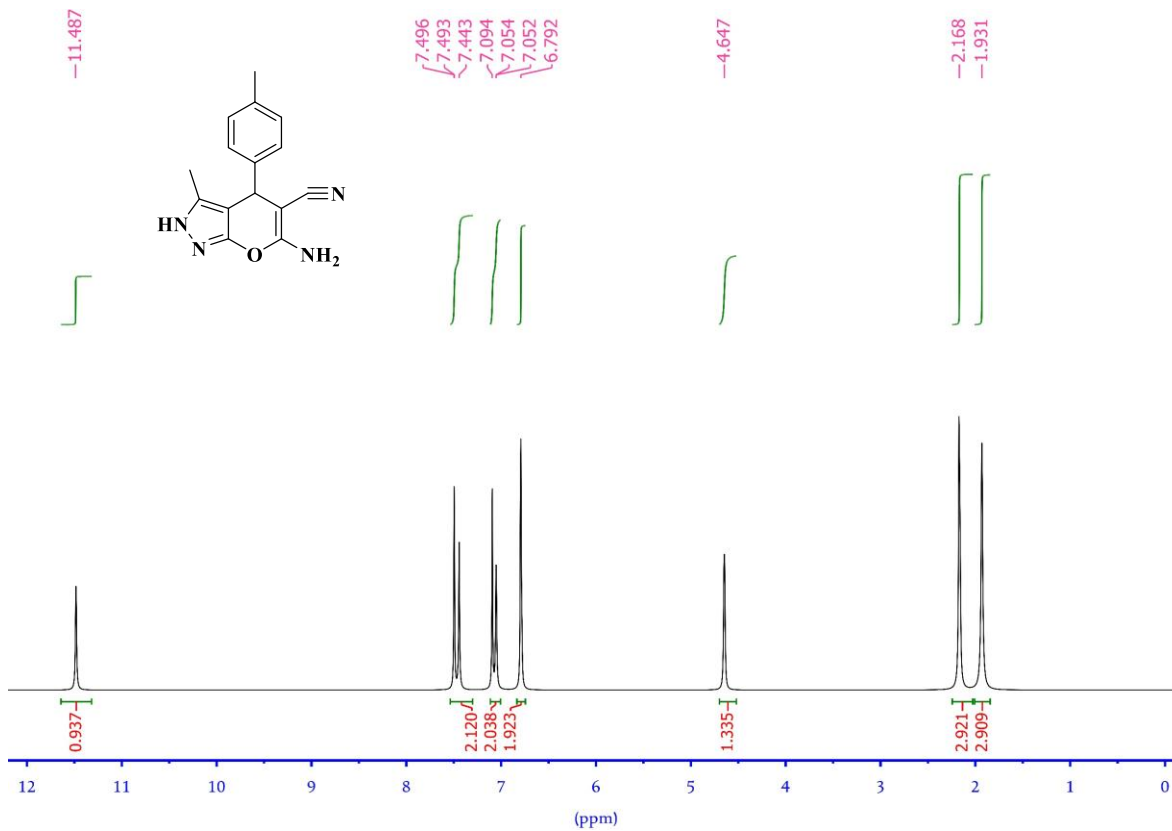

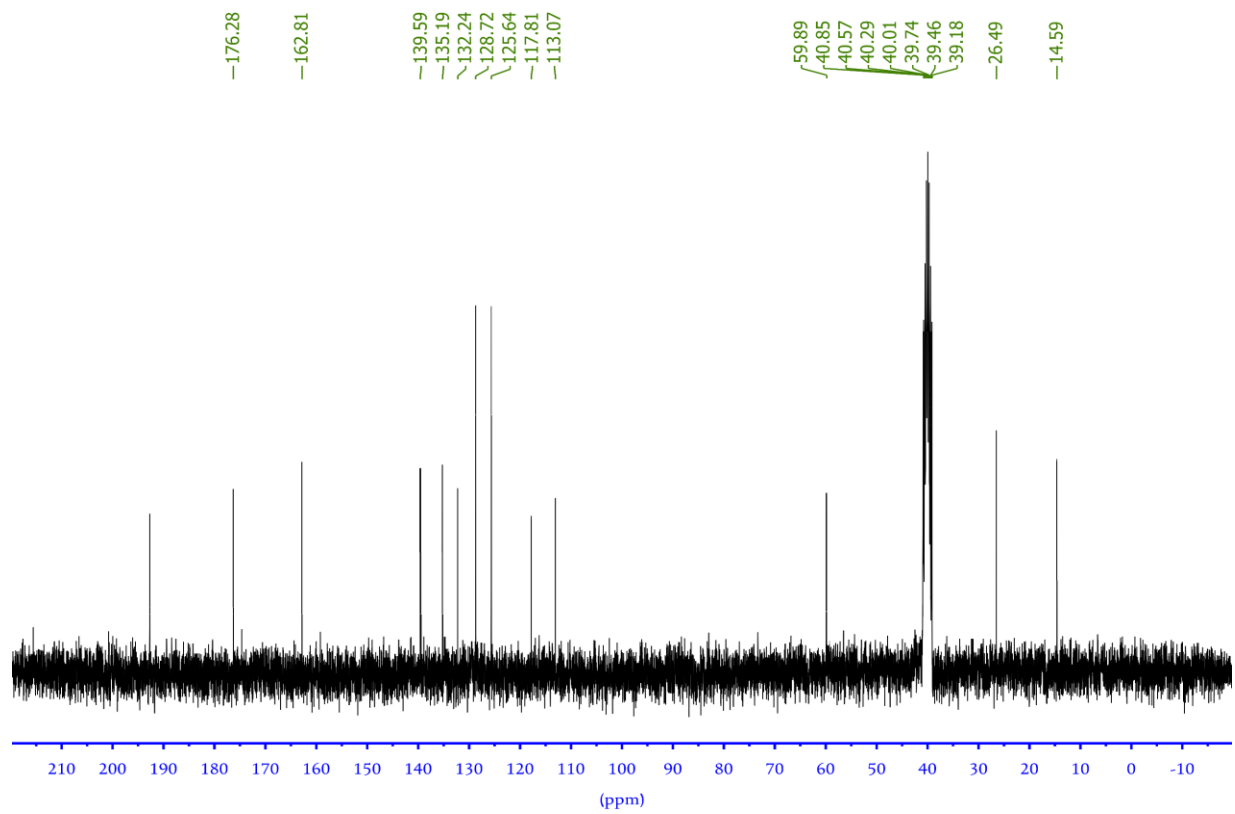

**6-amino-4-(4-fluorophenyl)-3-methyl-2,4-dihydropyrano[2,3-c]pyrazole-5-carbonitrile** (Table 3, entry 19):

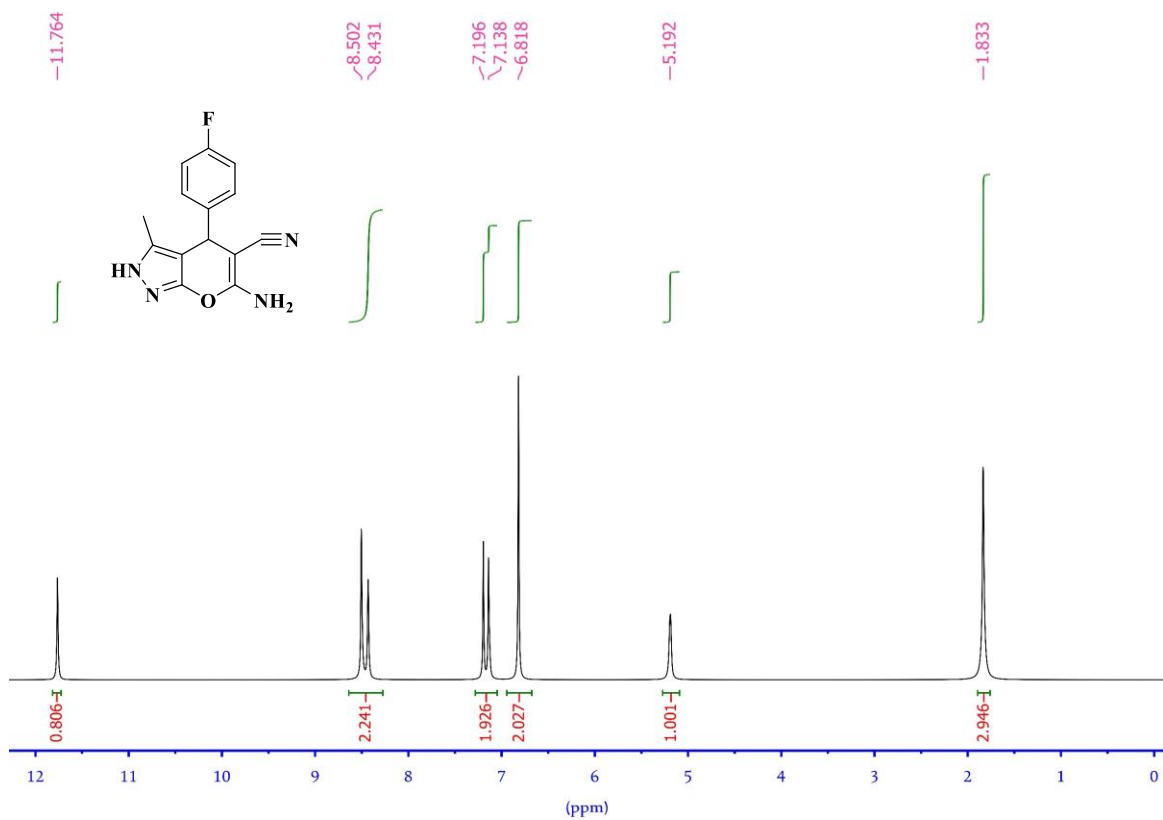

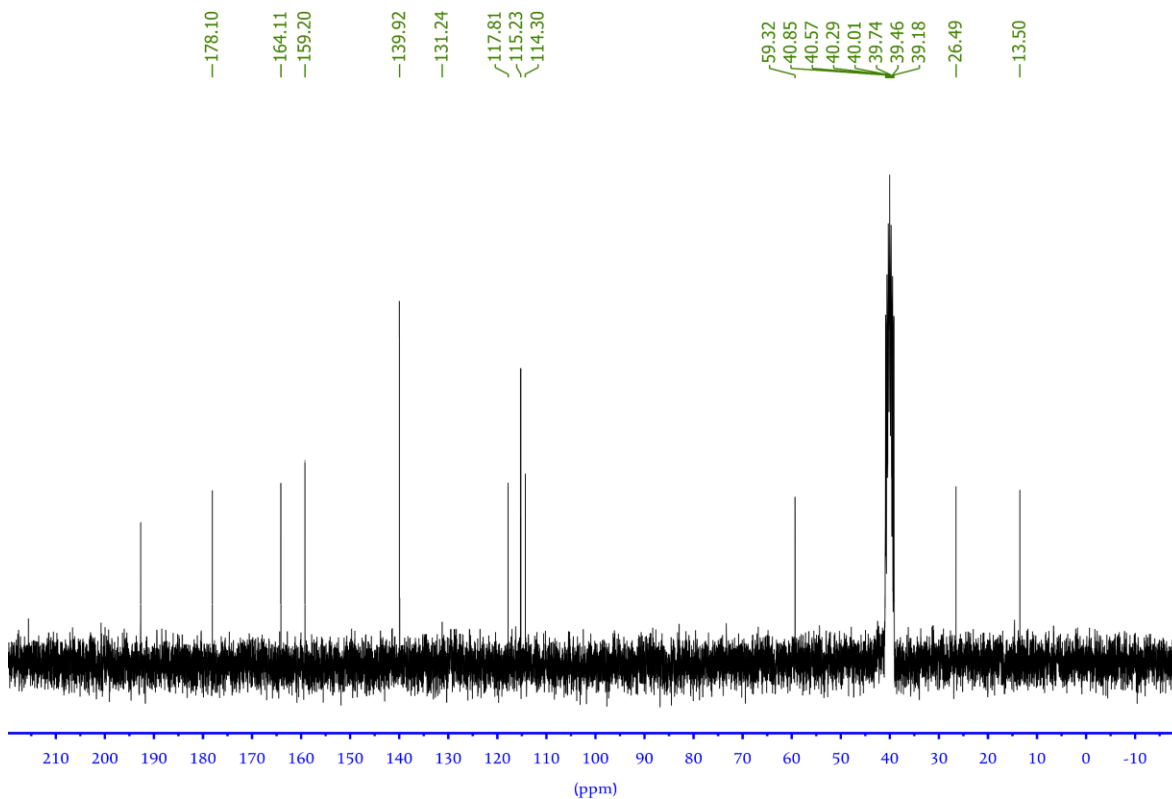

**6-amino-3-methyl-4-(4-nitrophenyl)-2,4-dihydropyrano[2,3-c]pyrazole-5-carbonitrile** (Table 3, entry 20):

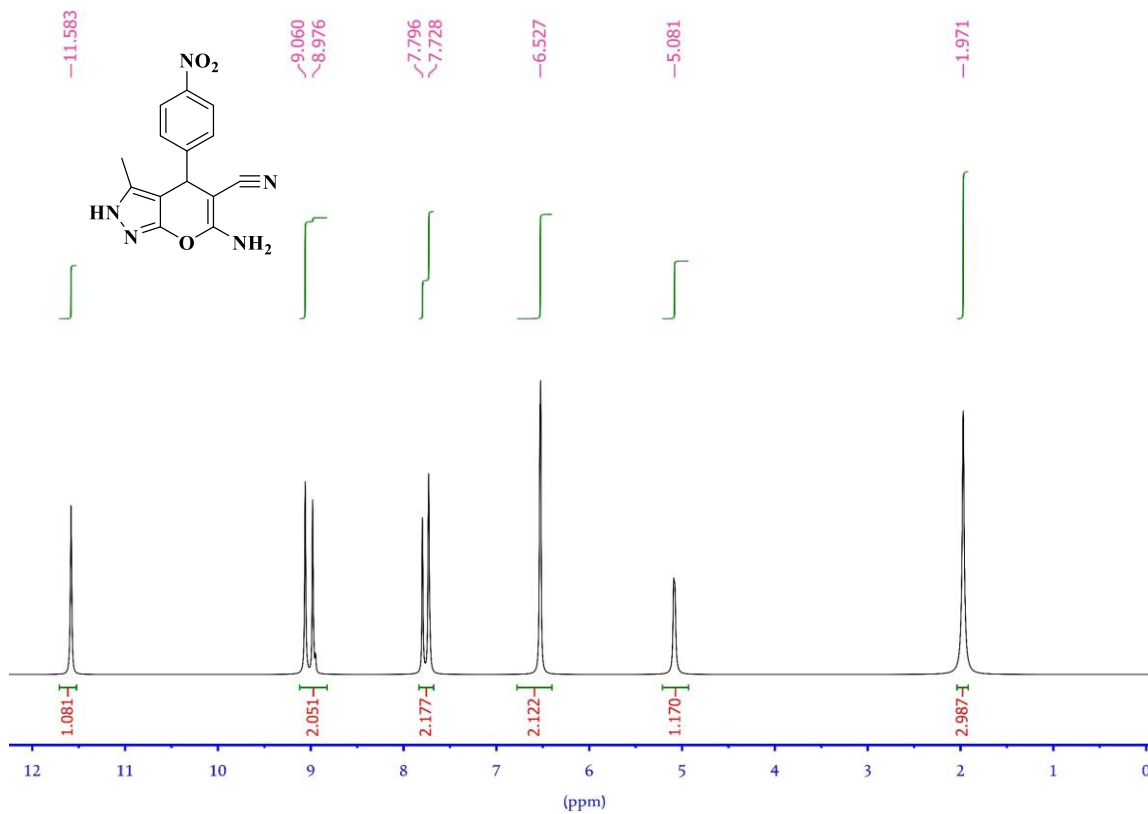



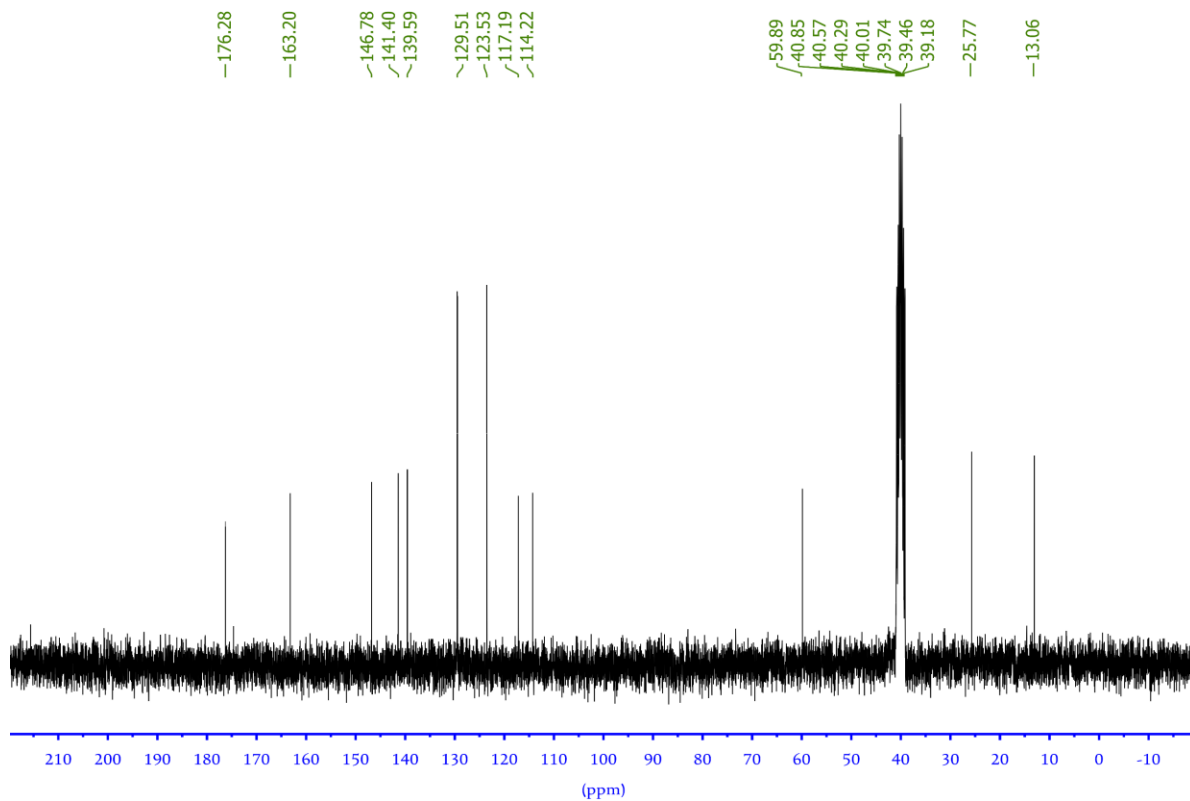

**6-amino-3-methyl-4-(3-nitrophenyl)-2,4-dihydropyrano[2,3-c]pyrazole-5-carbonitrile (Table 3, entry 21):**

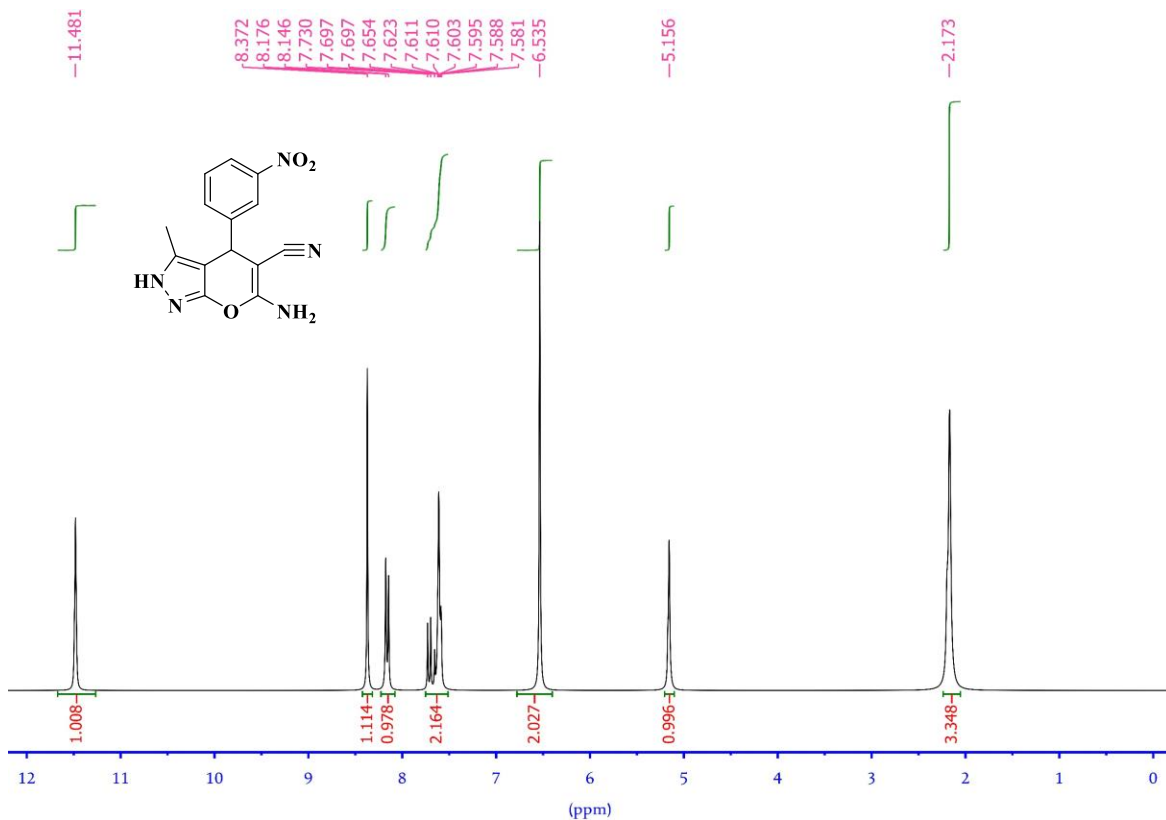

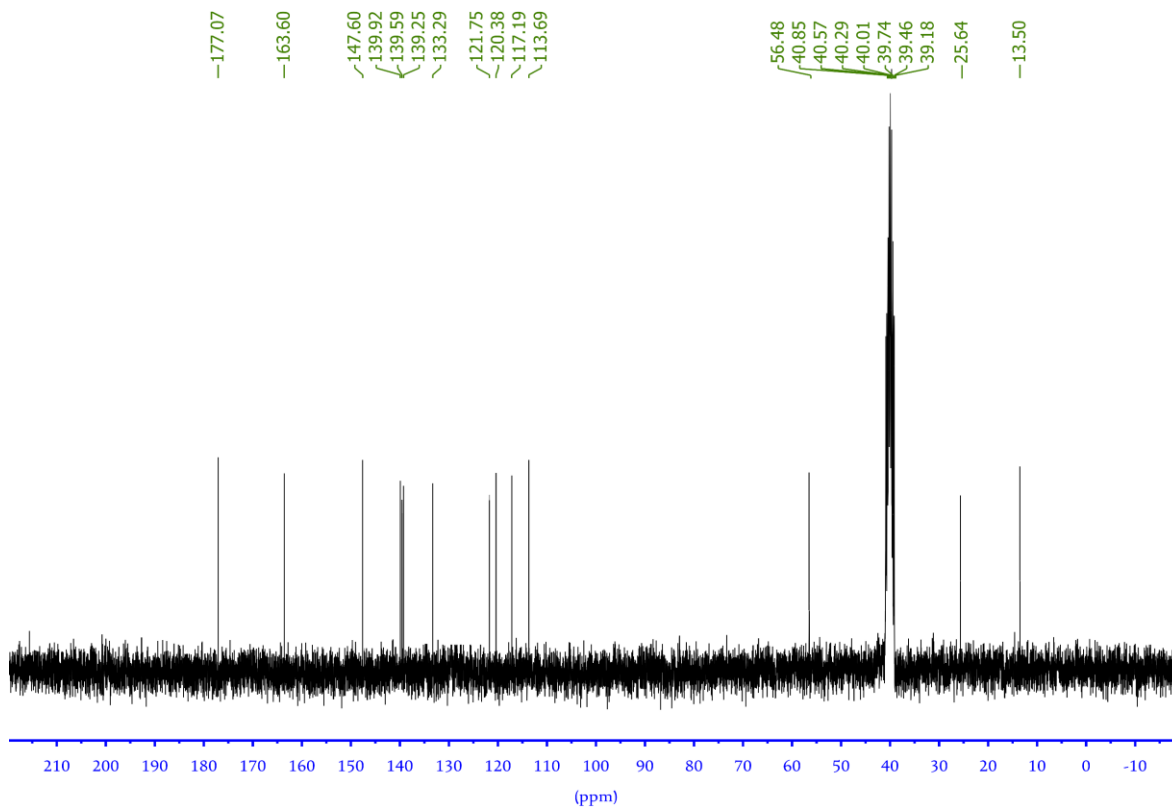

**6-amino-3-methyl-4-(2-nitrophenyl)-2,4-dihydropyrano[2,3-c]pyrazole-5-carbonitrile** (Table 3, entry 22):

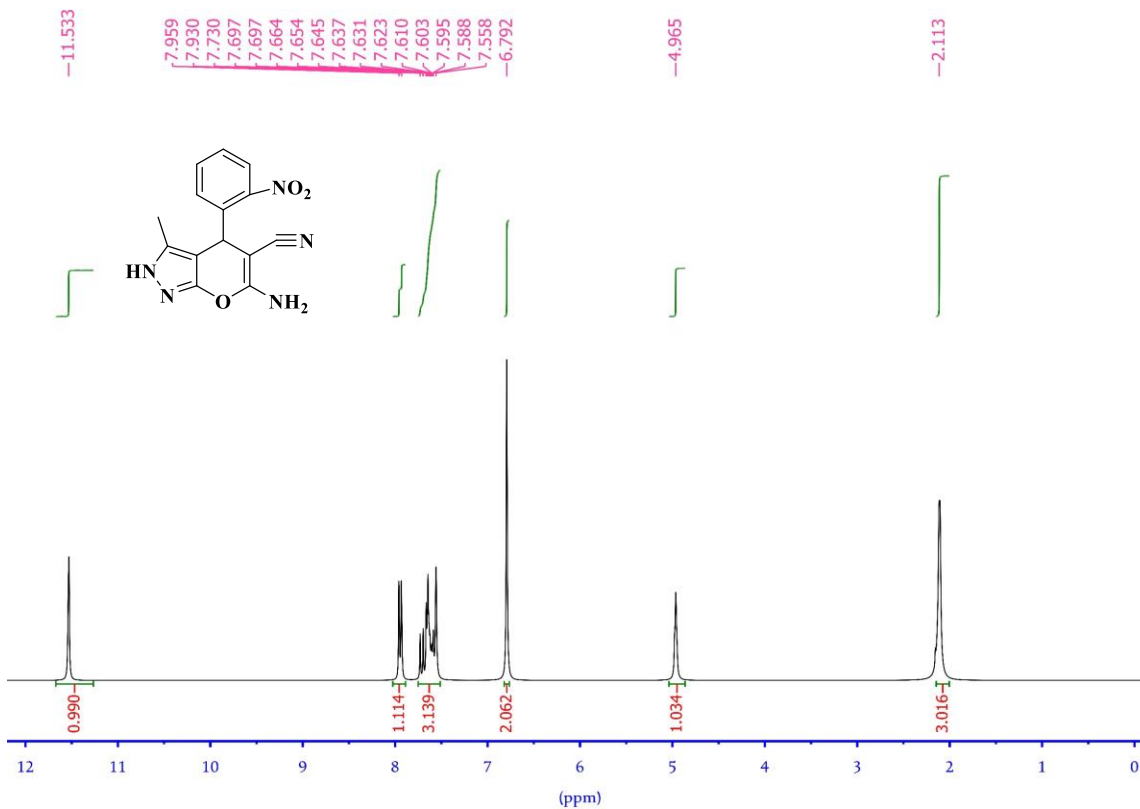

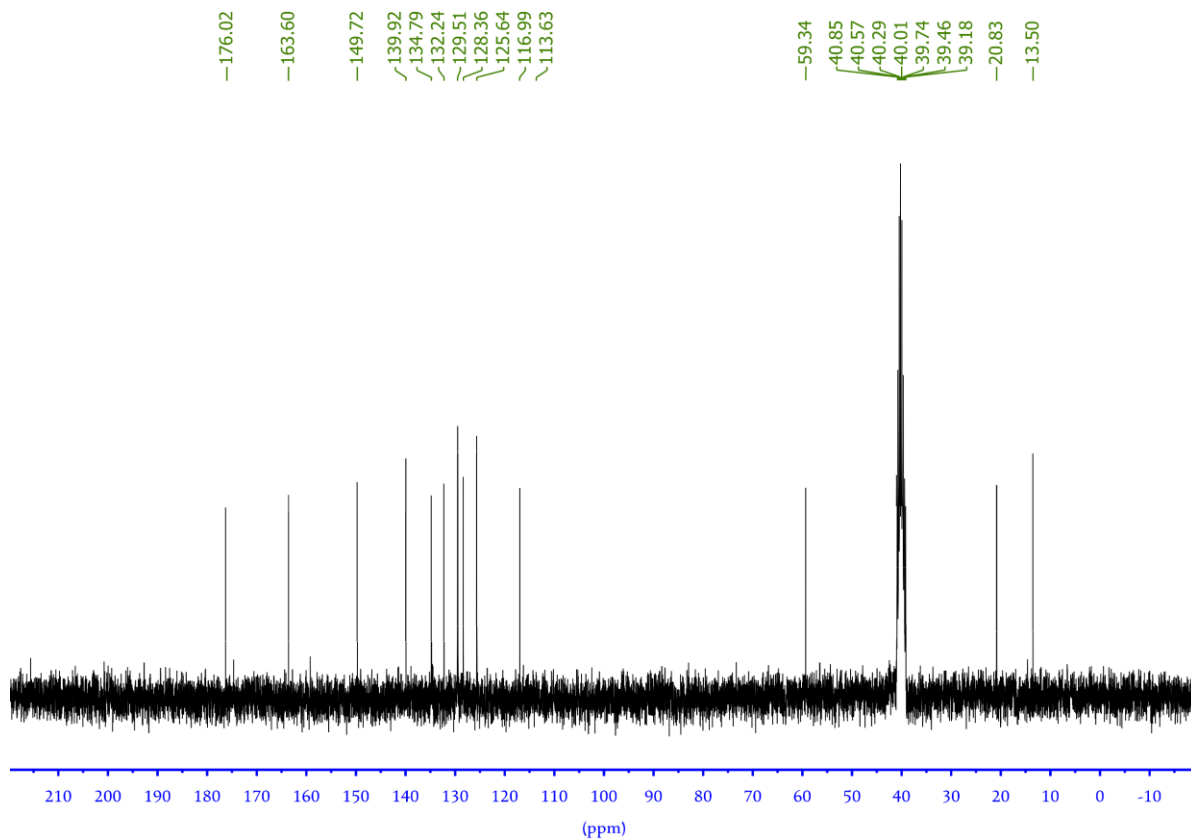

**6-amino-4-(2-chlorophenyl)-3-methyl-2,4-dihydropyrano[2,3-c]pyrazole-5-carbonitrile** (Table 3, entry 23):

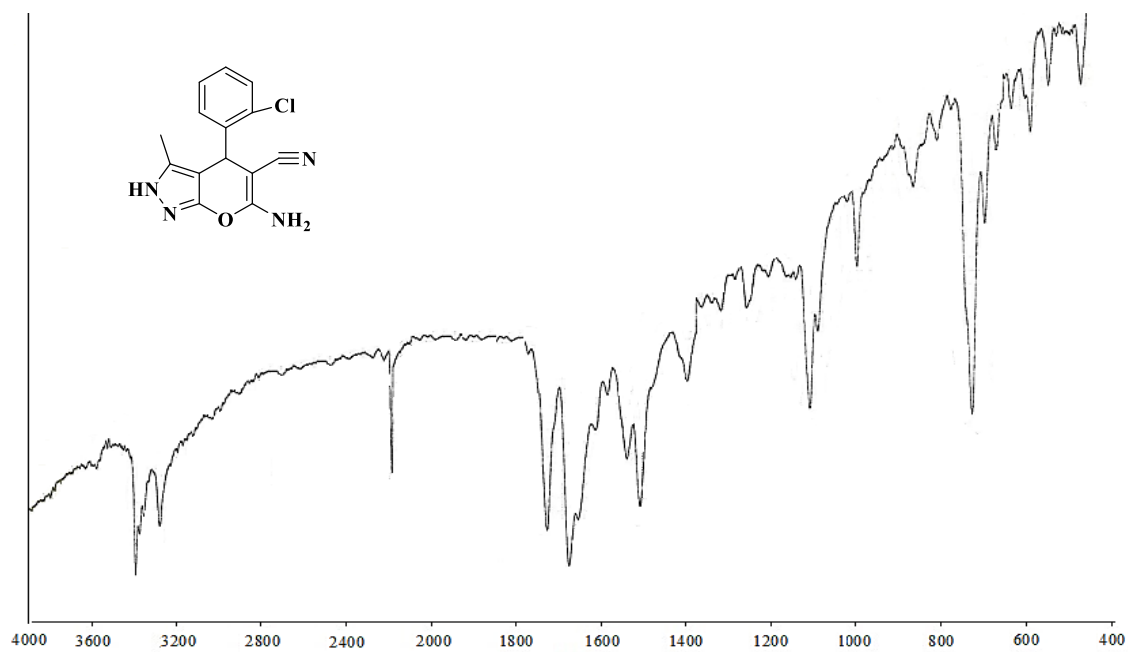

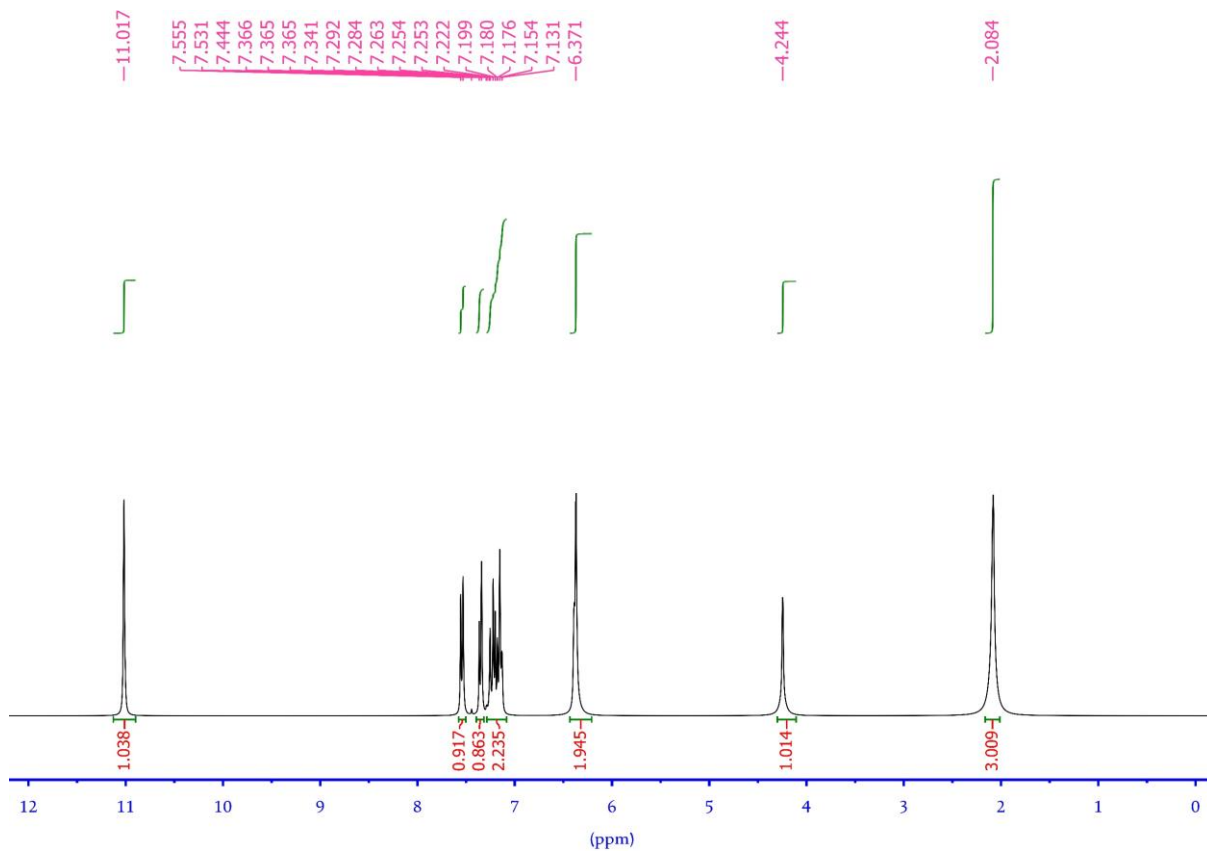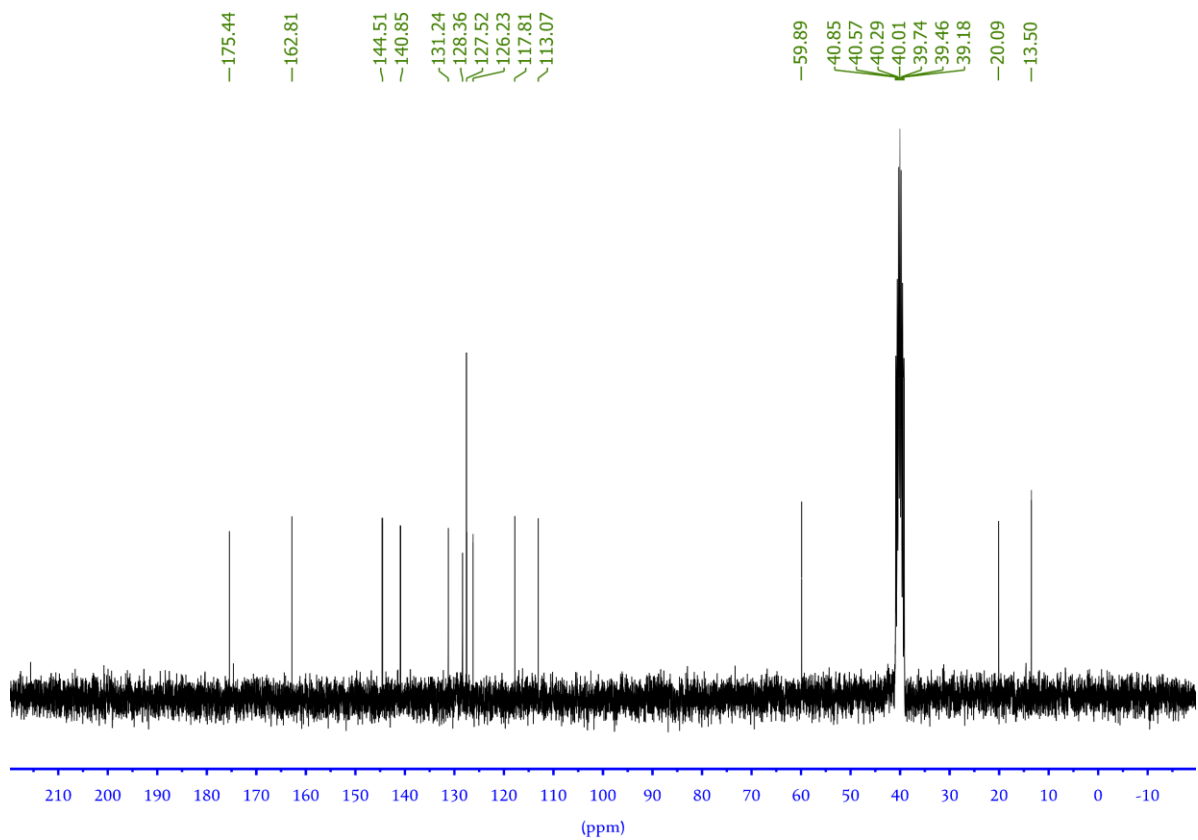

**6-amino-4-(2-bromophenyl)-3-methyl-2,4-dihydropyrano[2,3-c]pyrazole-5-carbonitrile (Table 3, entry 24):**

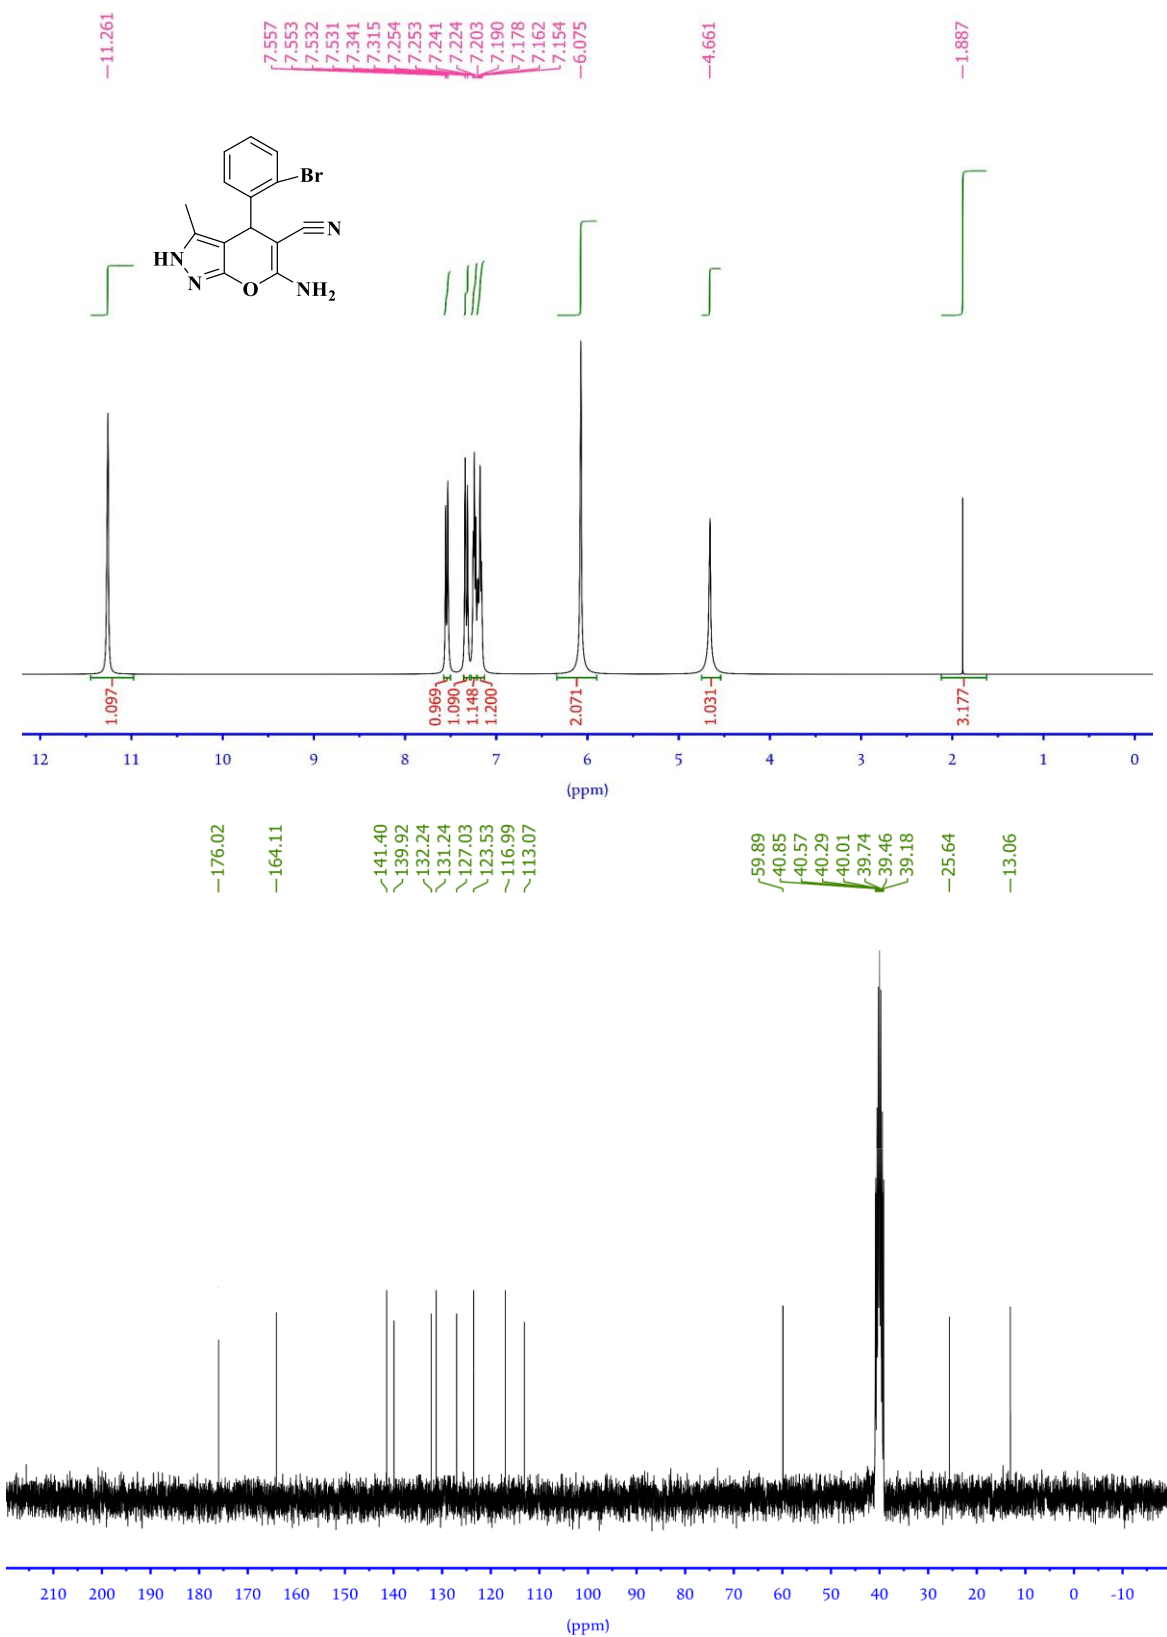

Supplement: d0ra04698a1.pdf [file d0ra04698a1.pdf]
